# Supplementary material for: Novel meriolin derivatives activate the mitochondrial apoptosis pathway in the presence of antiapoptotic Bcl-2
Source: PubMed Central journal article supplement (PMC10924942; doi:10.1038/s41420-024-01901-y), 2024-03-09

### Figure 3G

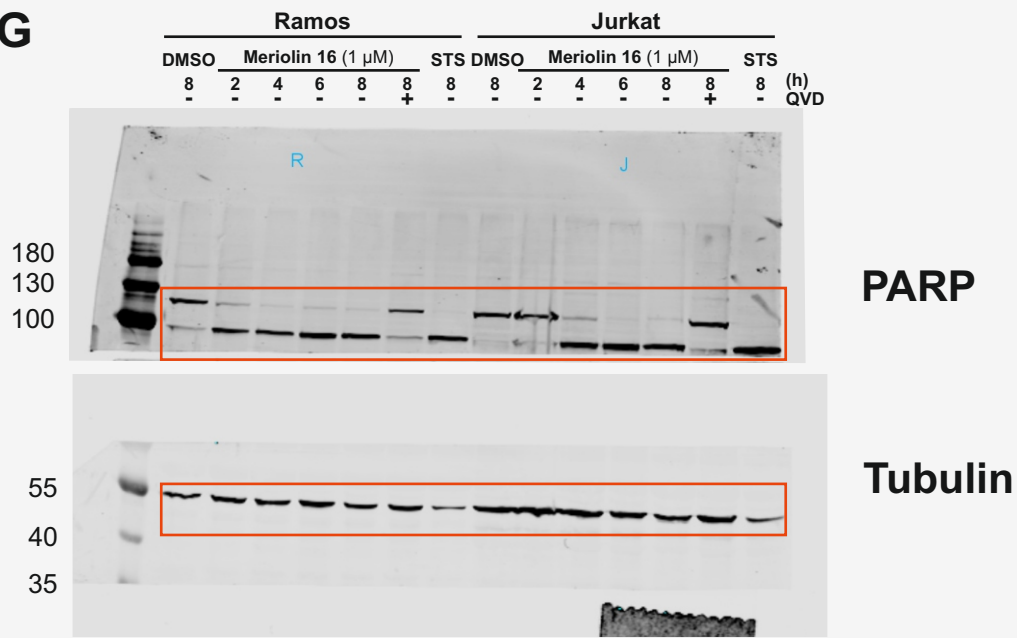

### Figure 3H

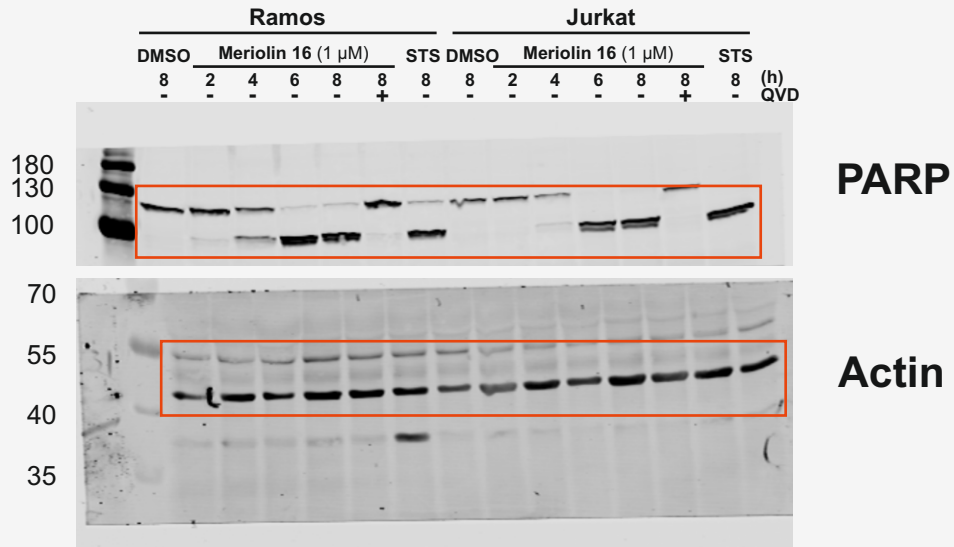

### Figure 3I

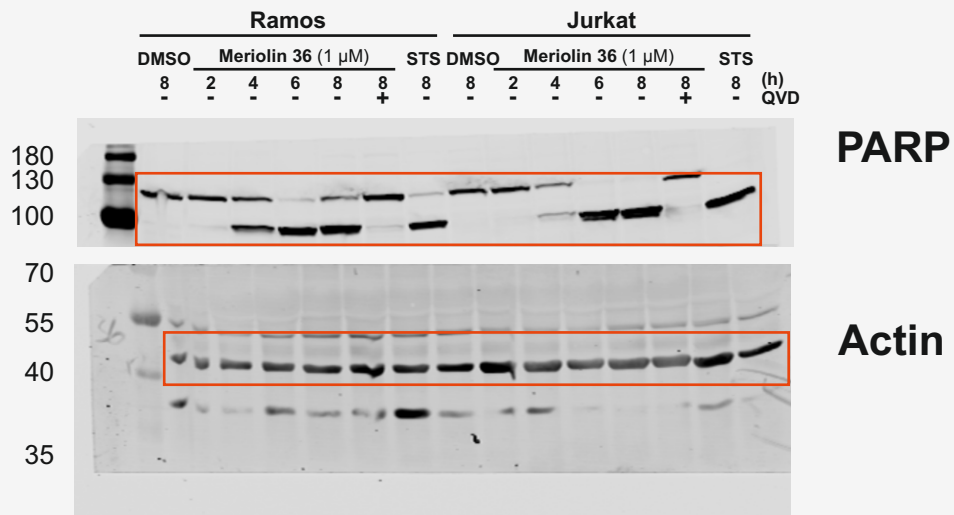

**Figure 4B**  
(left panel)

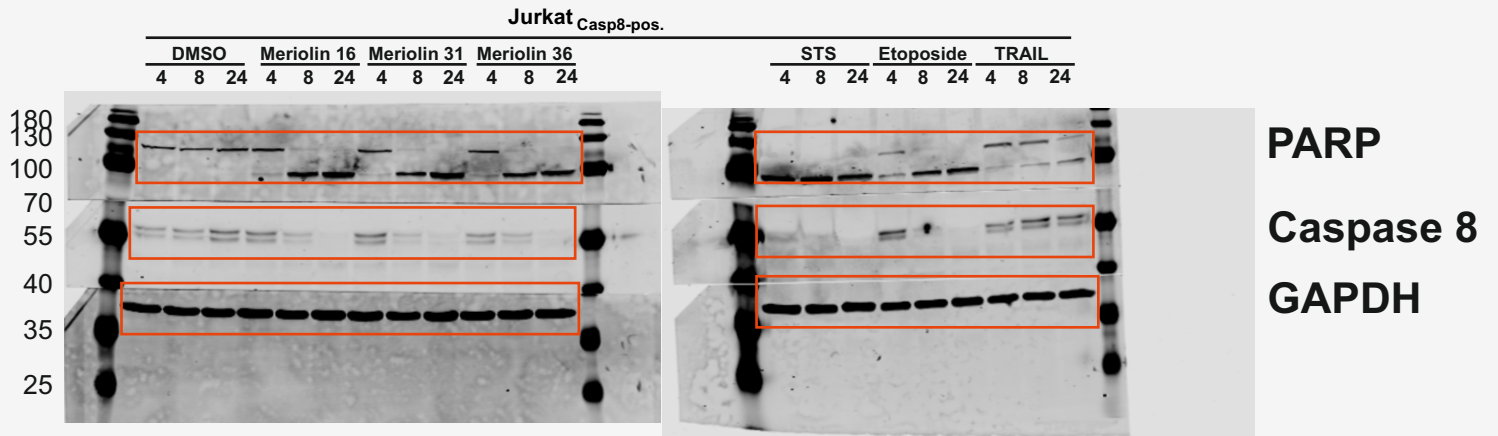

**Figure 4B**  
(right panel)

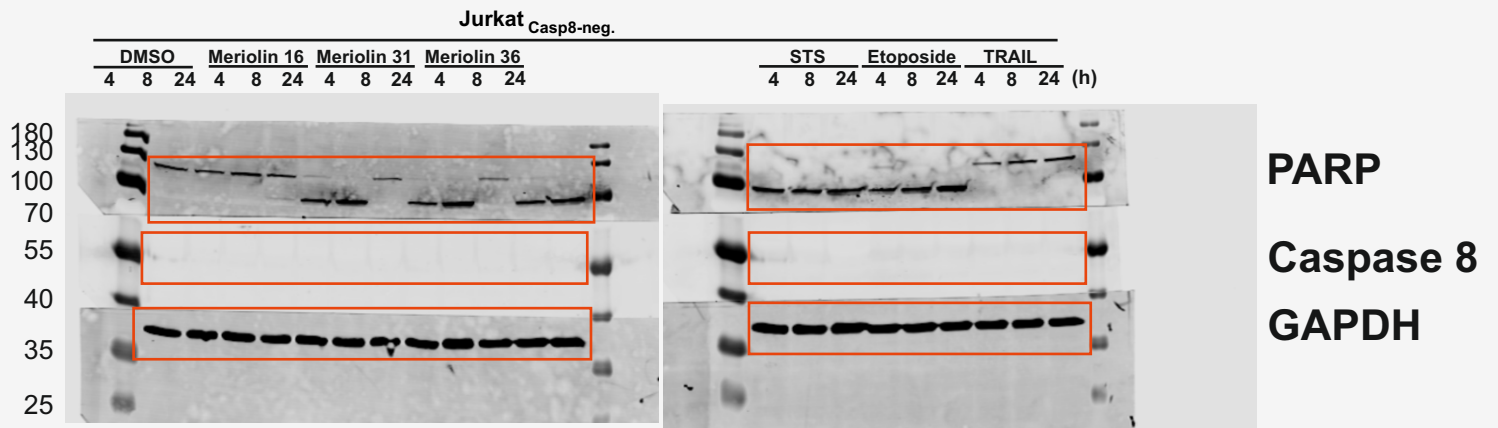

**Figure 4D**

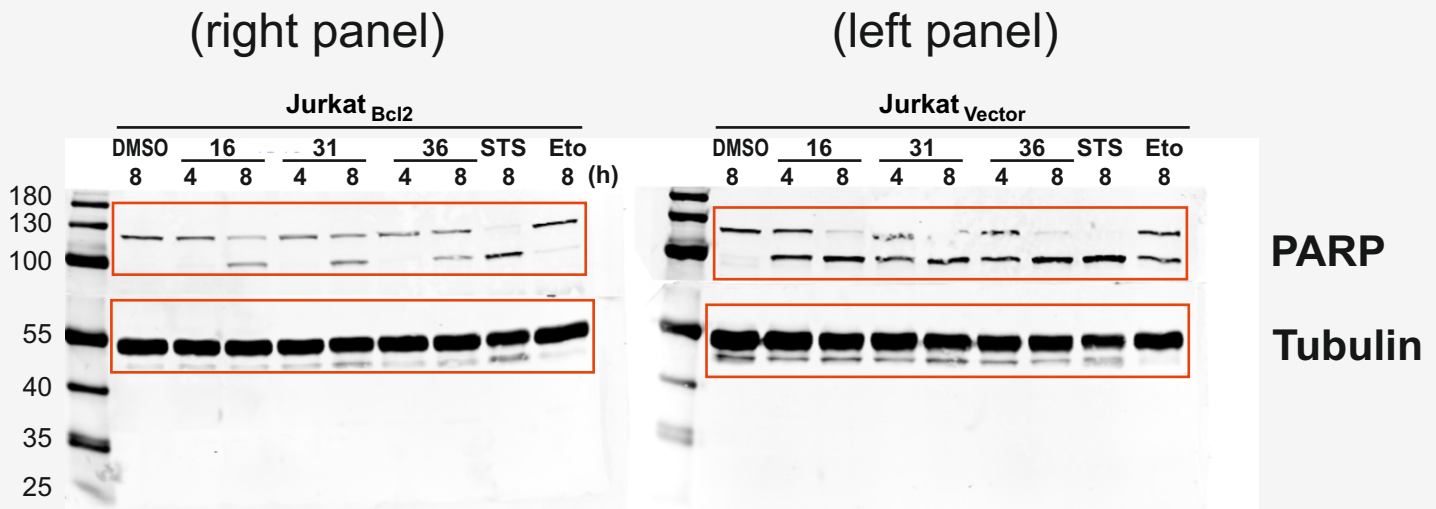

**Figure 4F**

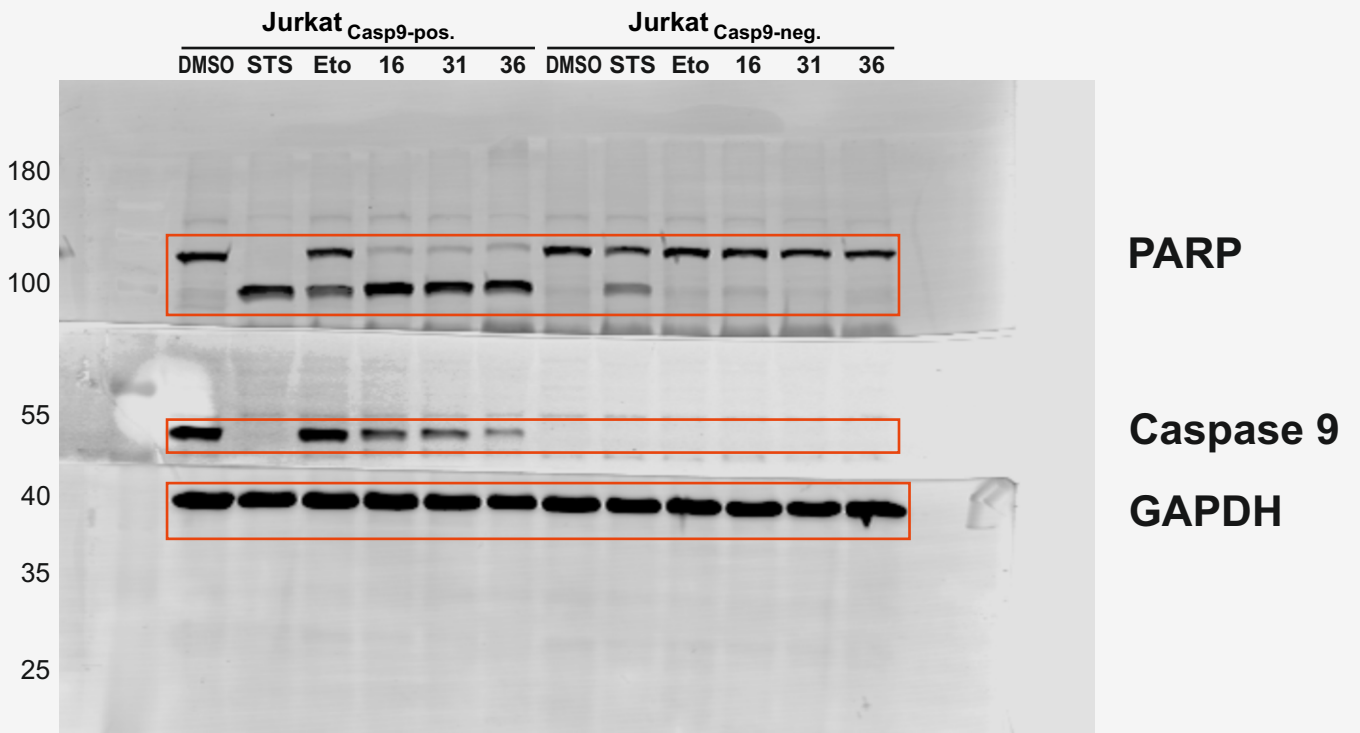

**Figure 6B**

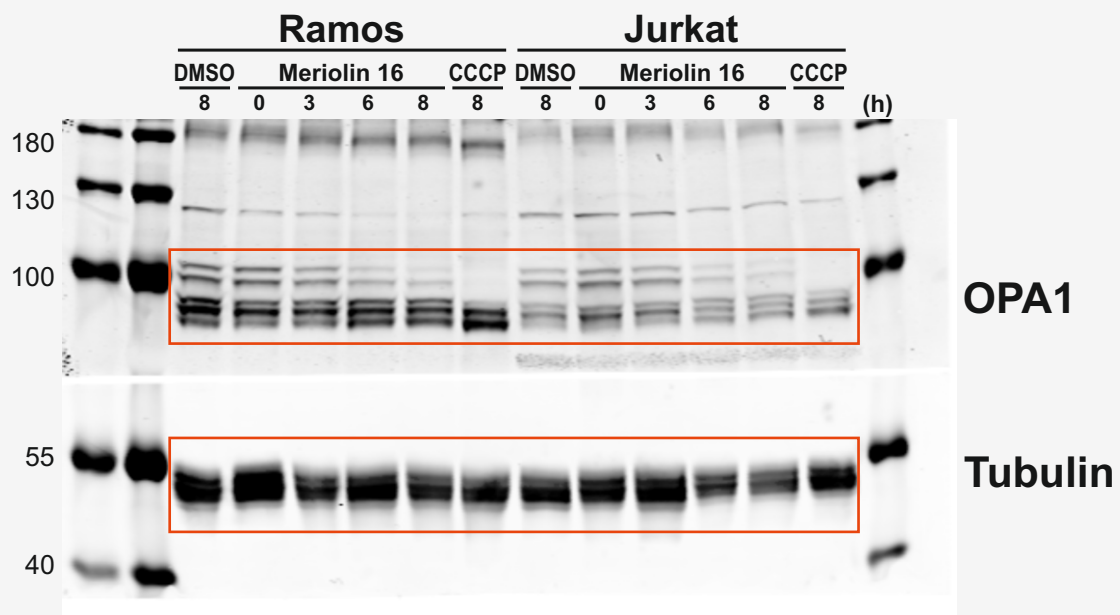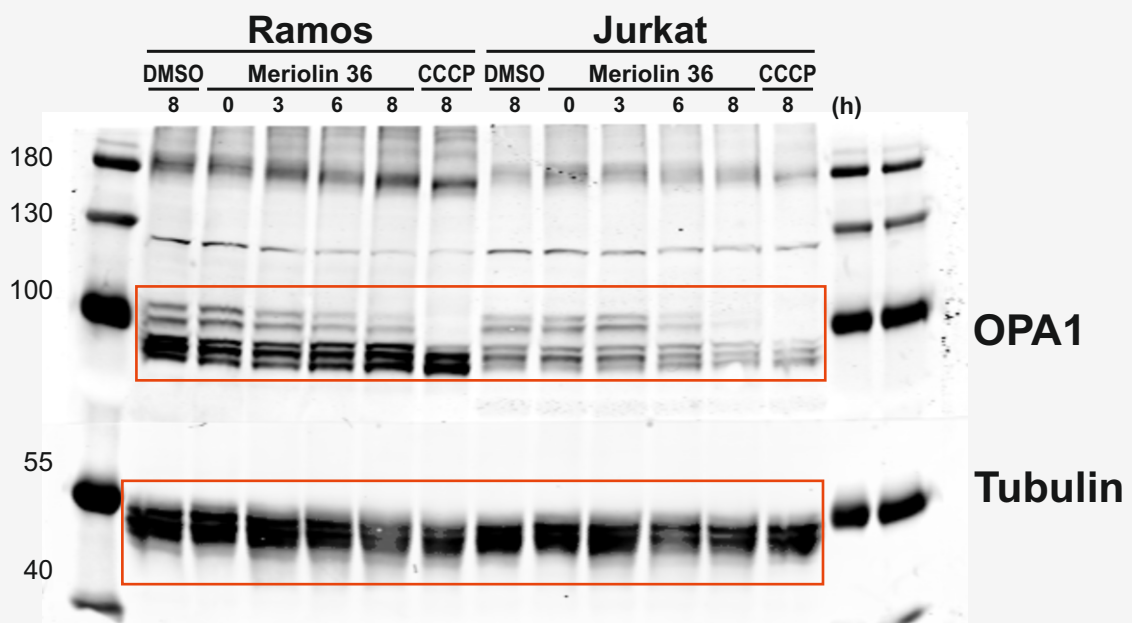

# Suppl. Figure 2B

4 h

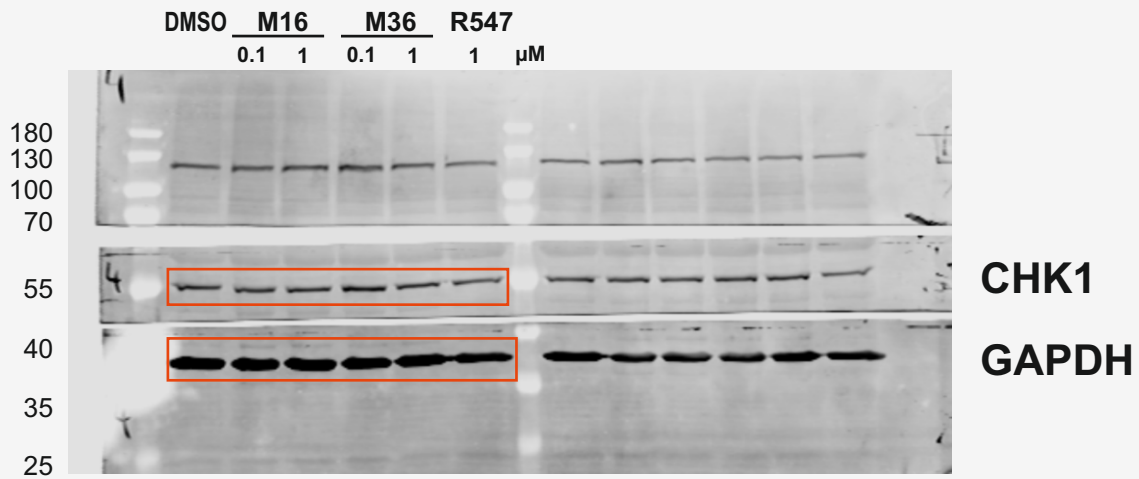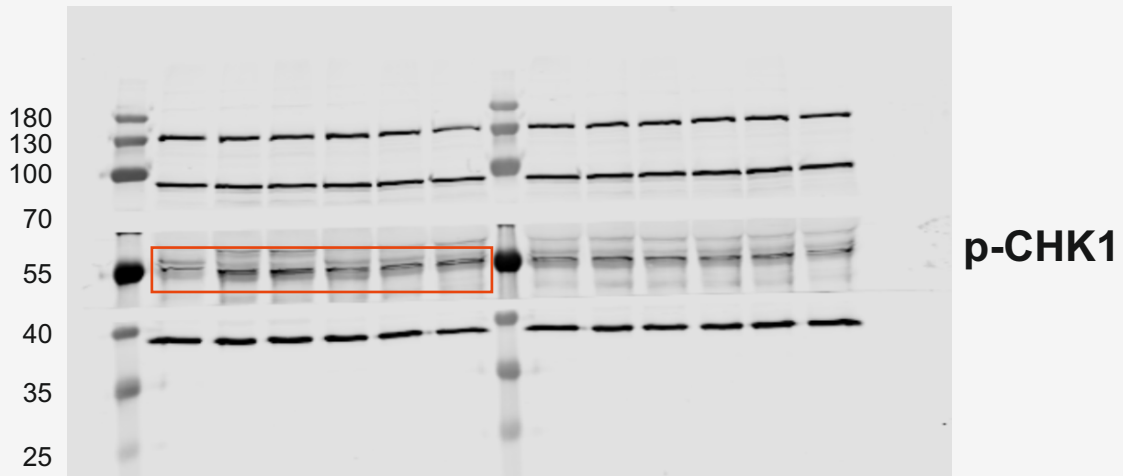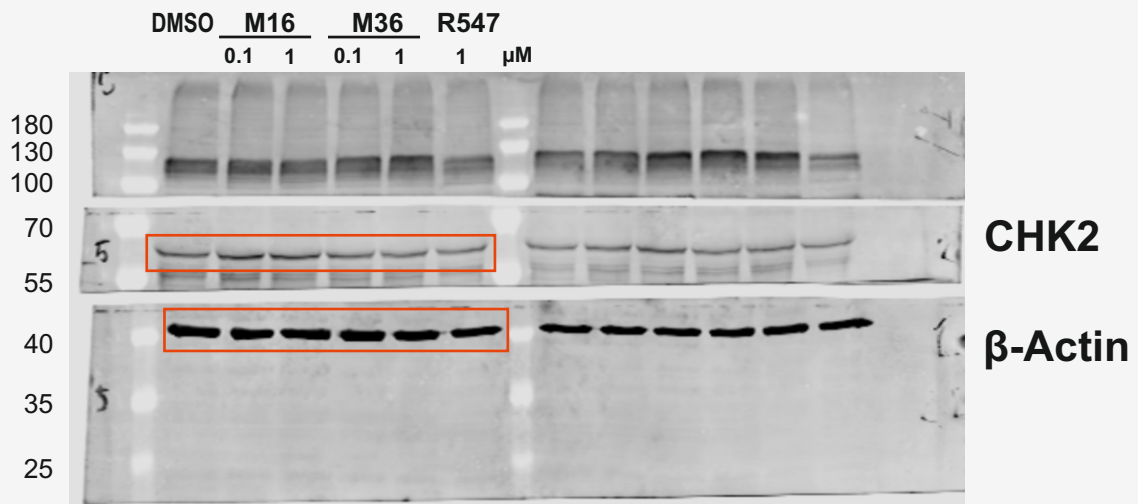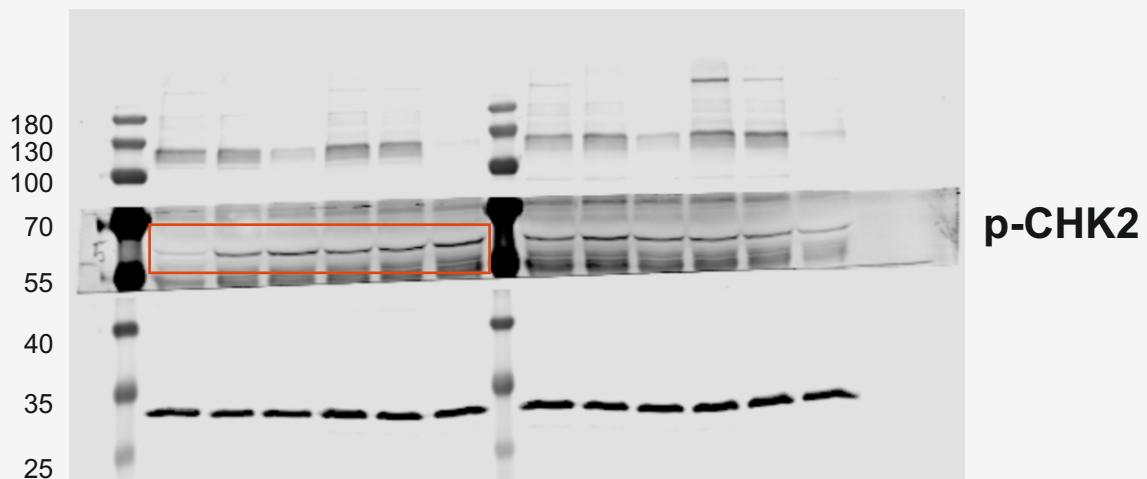

# Suppl. Figure 2B

8 h

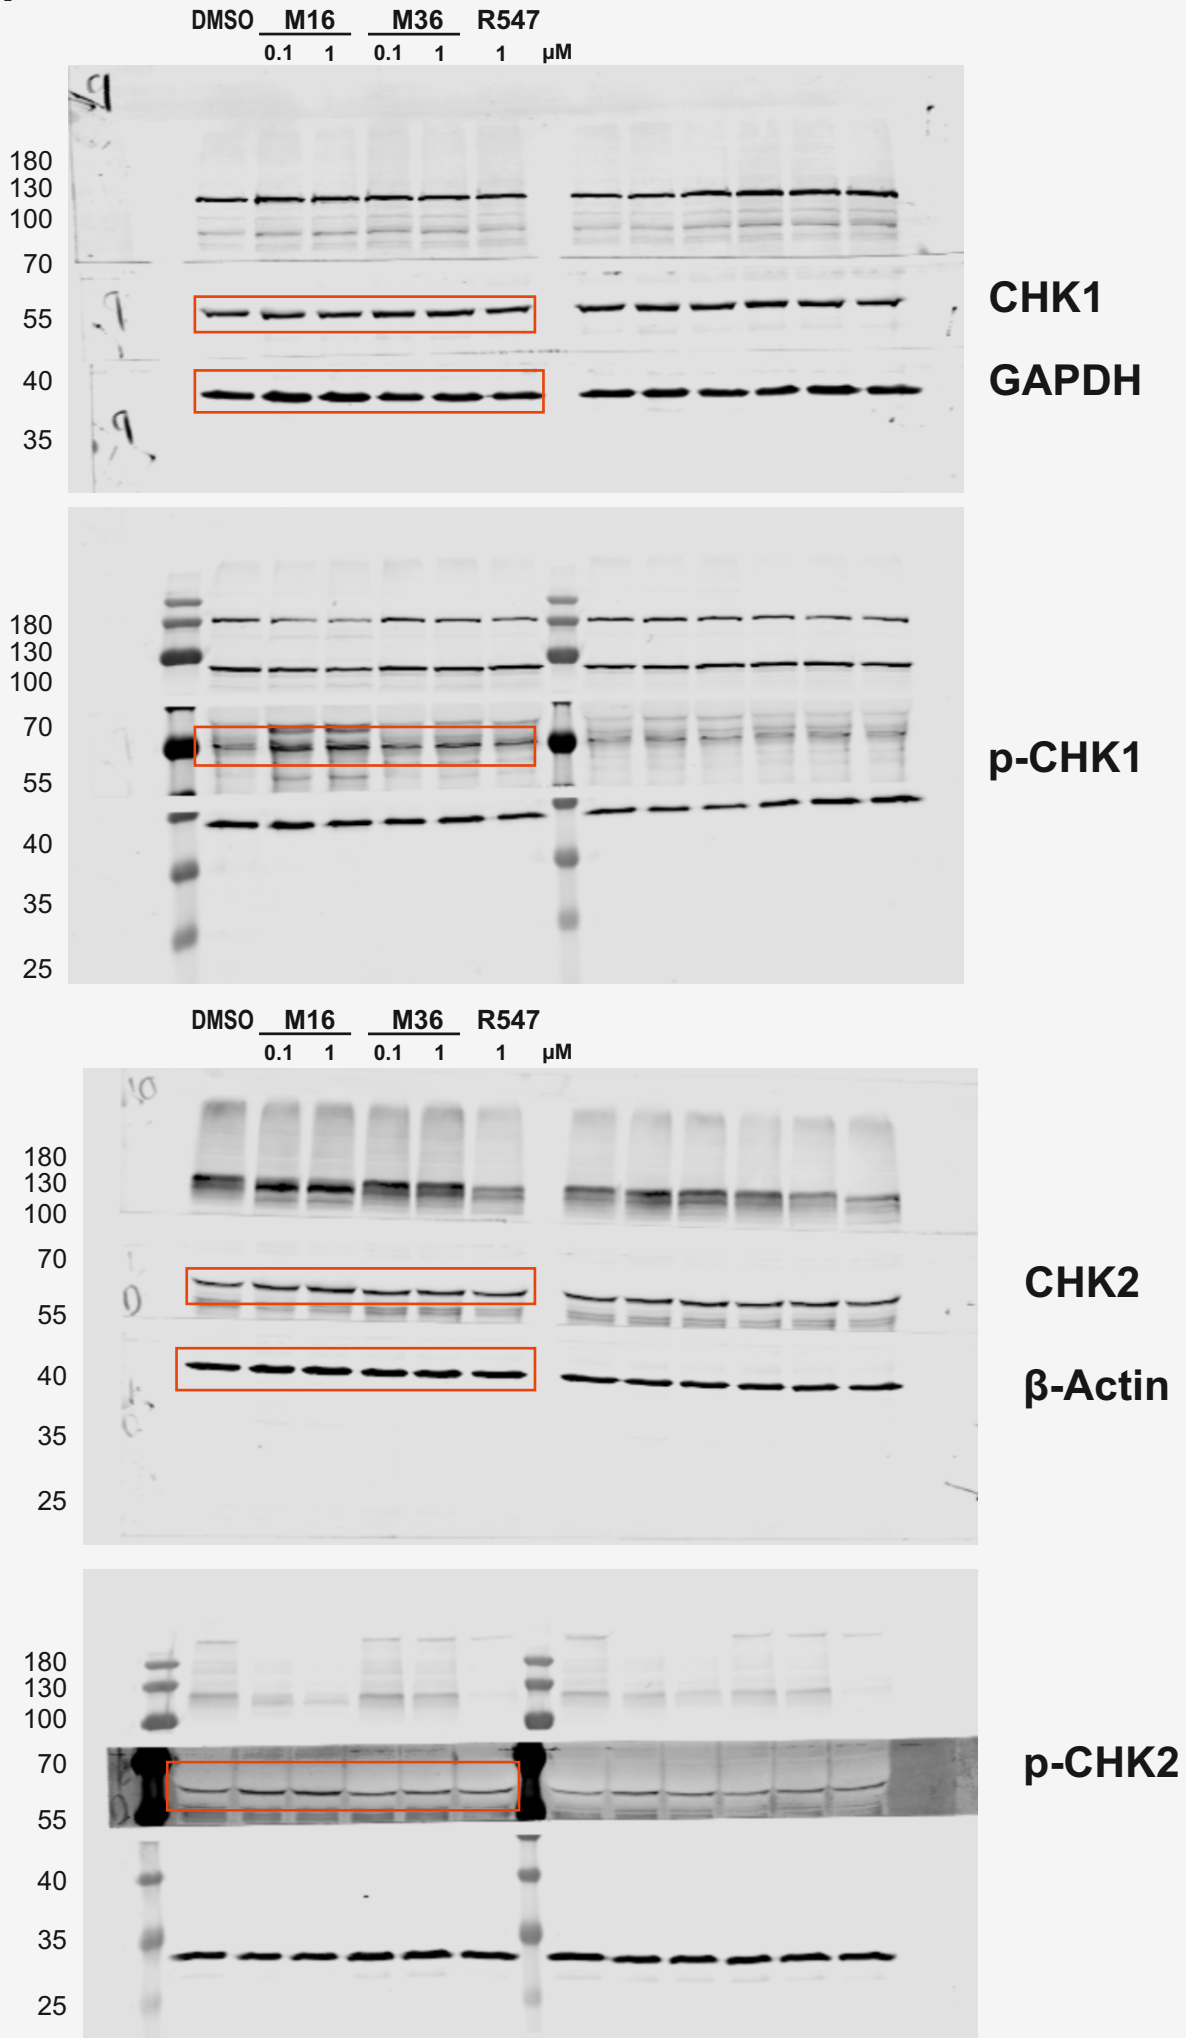

# Suppl. Figure 2B

12 h

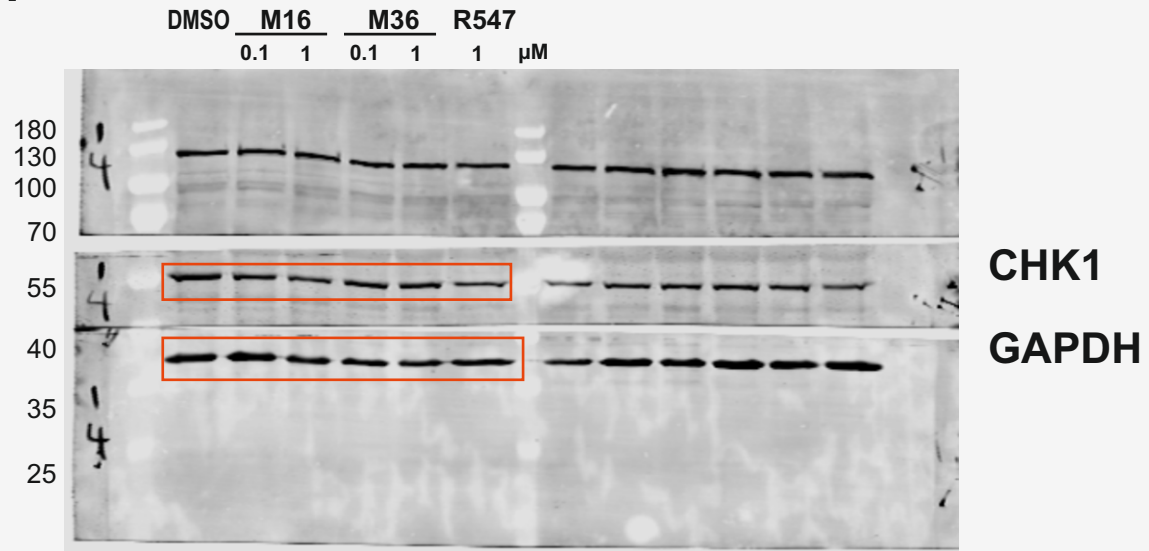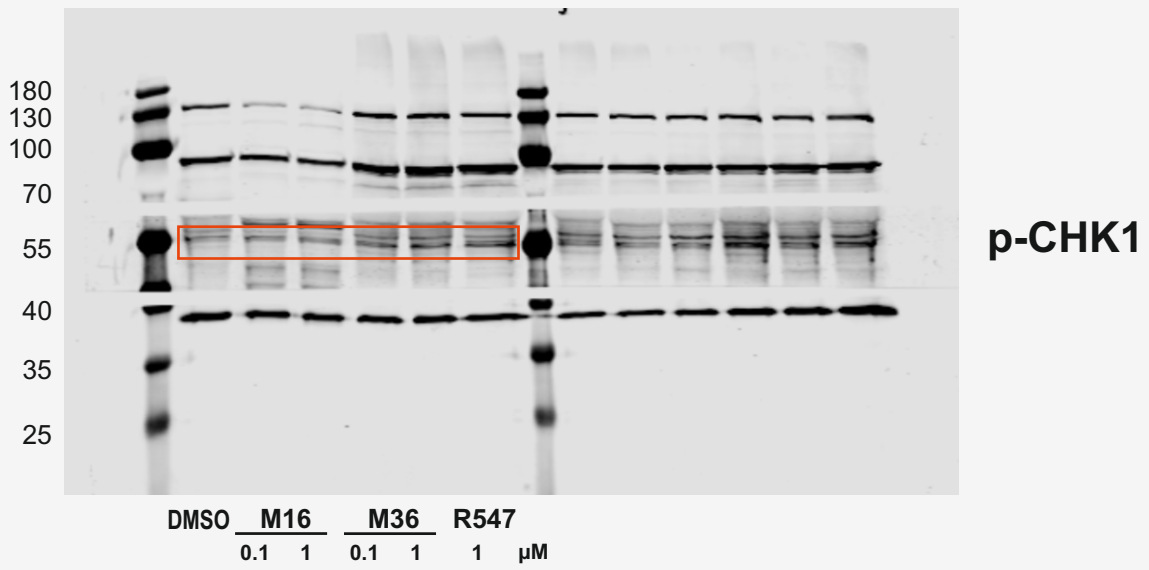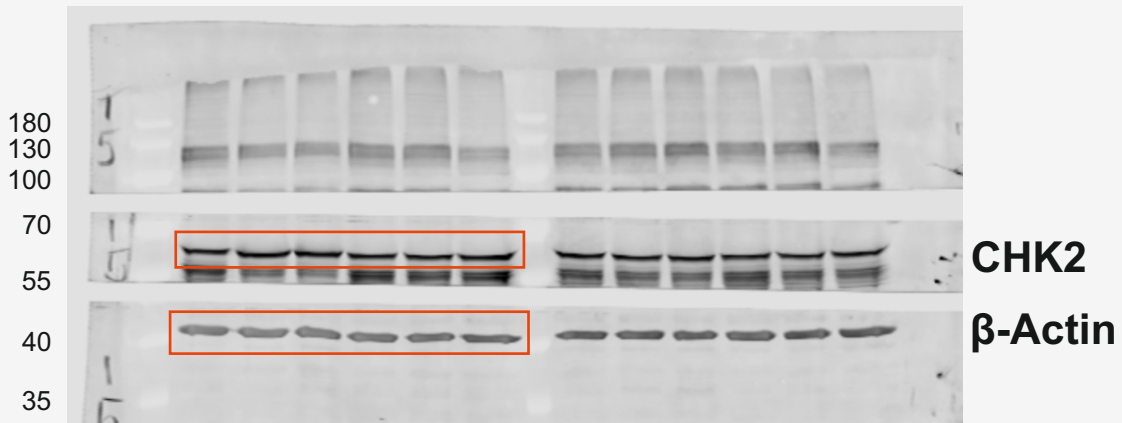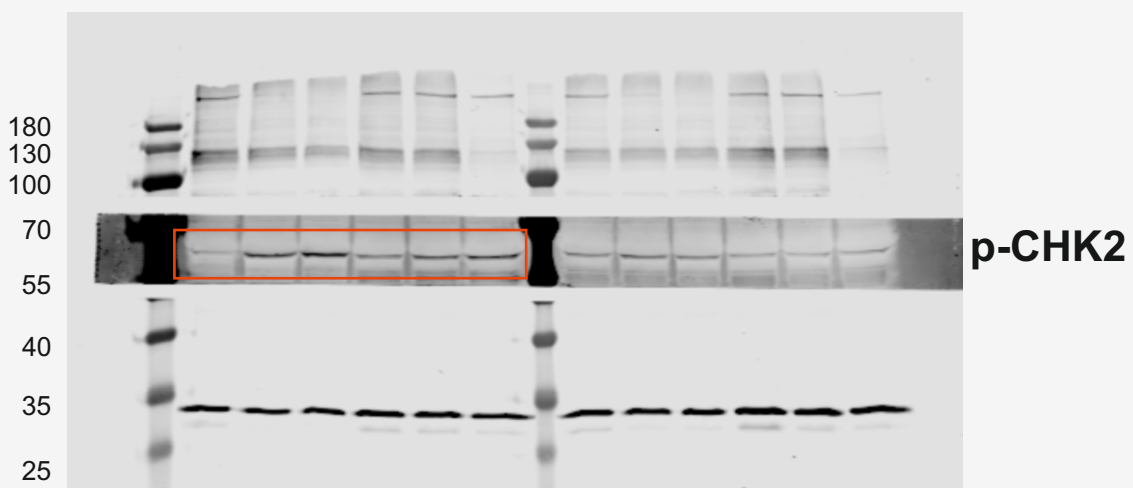



# Suppl. Figure 2B

16 h

DMSO    M16    M36    R547  
          0.1 1    0.1 1    1     $\mu$ M

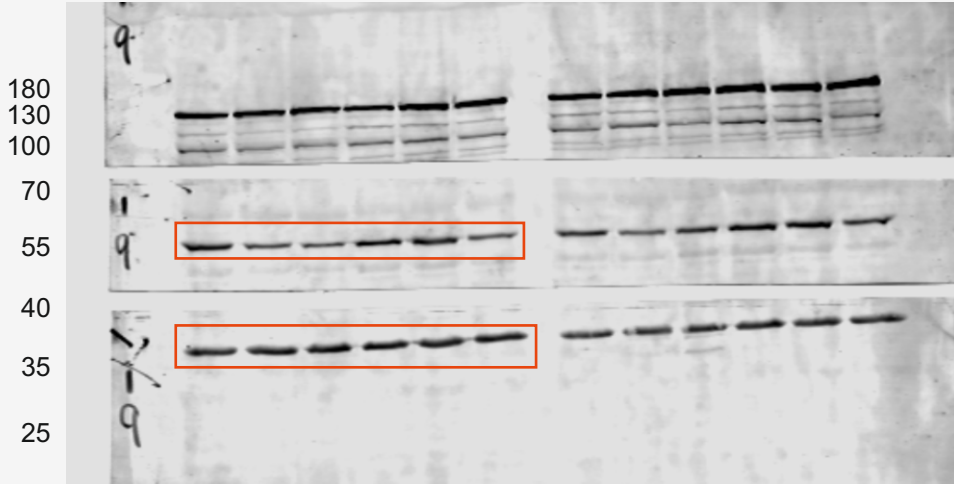

CHK1

GAPDH

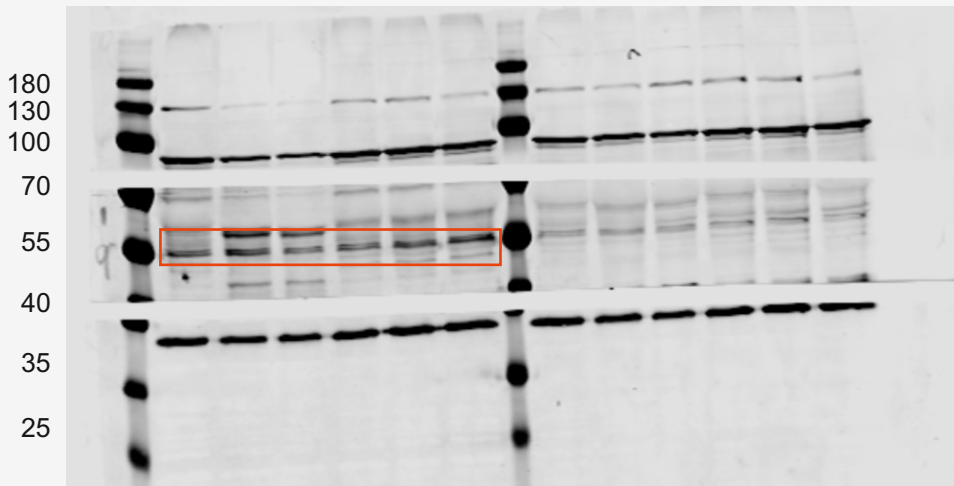

p-CHK1

DMSO    M16    M36    R547  
          0.1 1    0.1 1    1     $\mu$ M

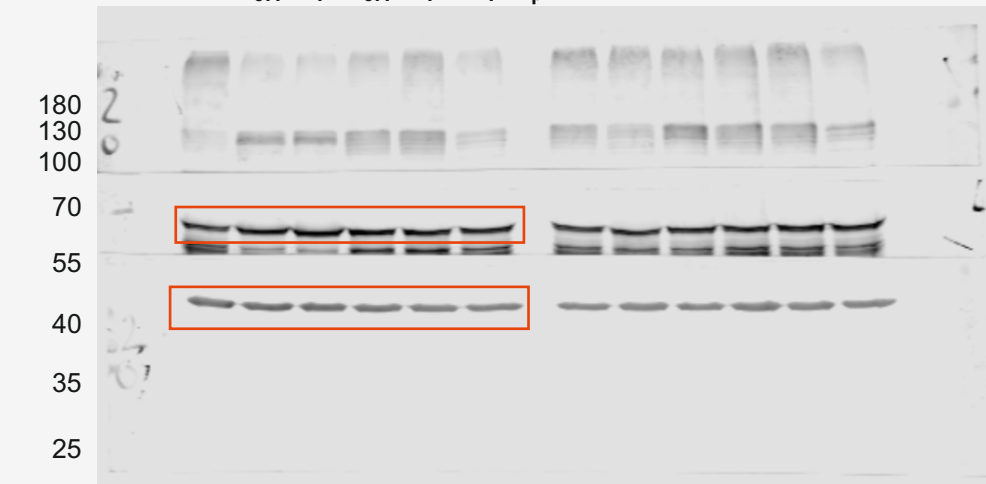

CHK2

$\beta$ -Actin

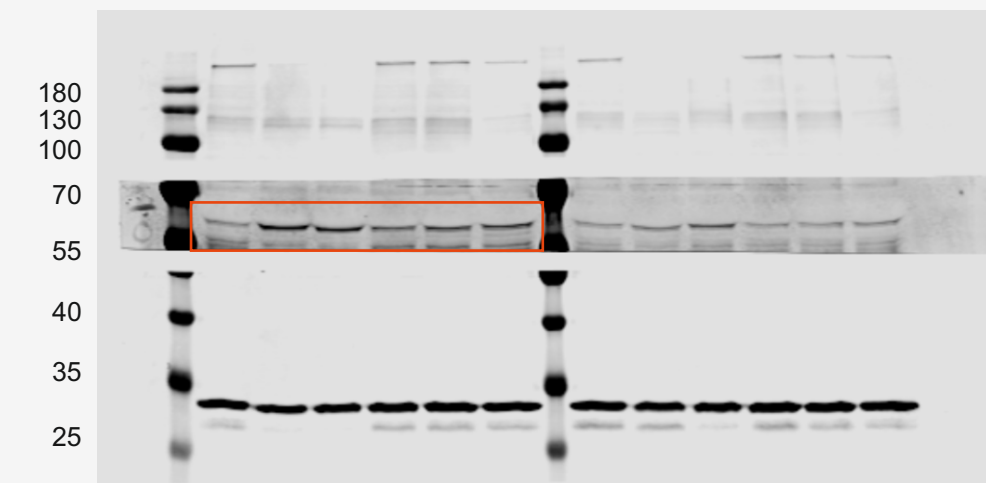

p-CHK2

# Suppl. Figure 2B

24 h

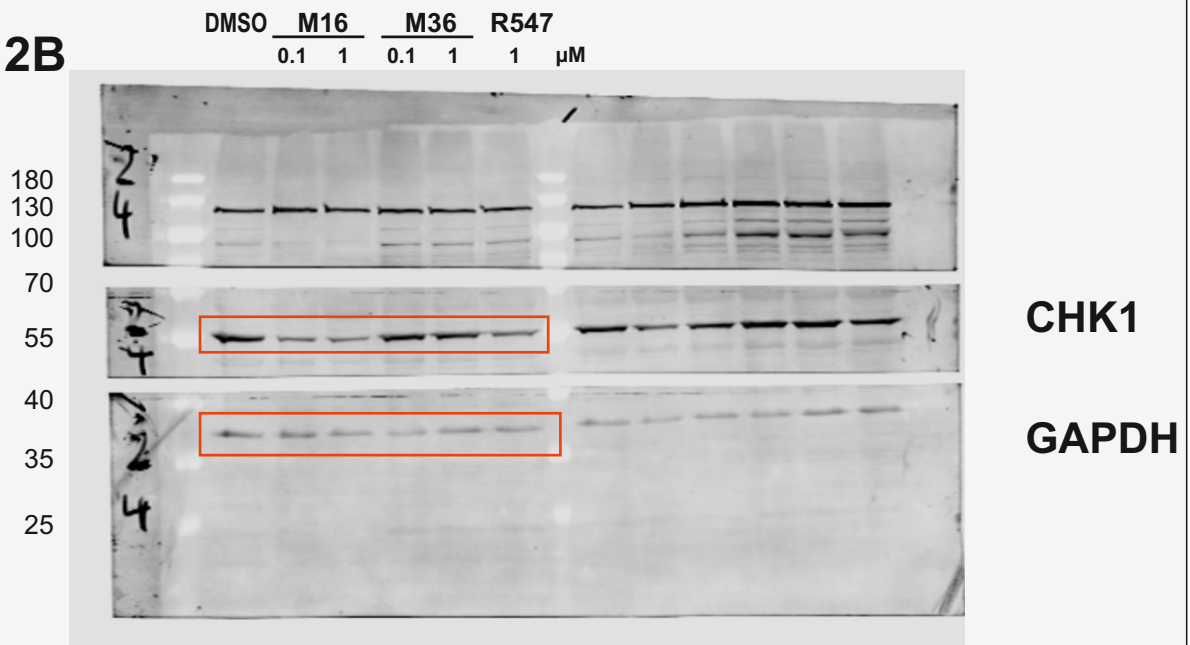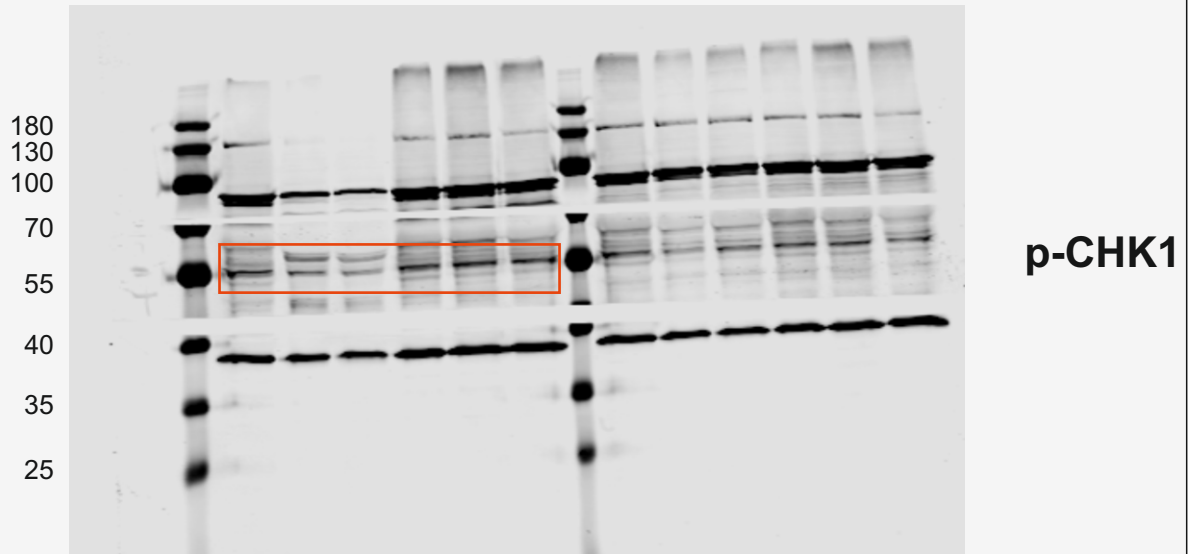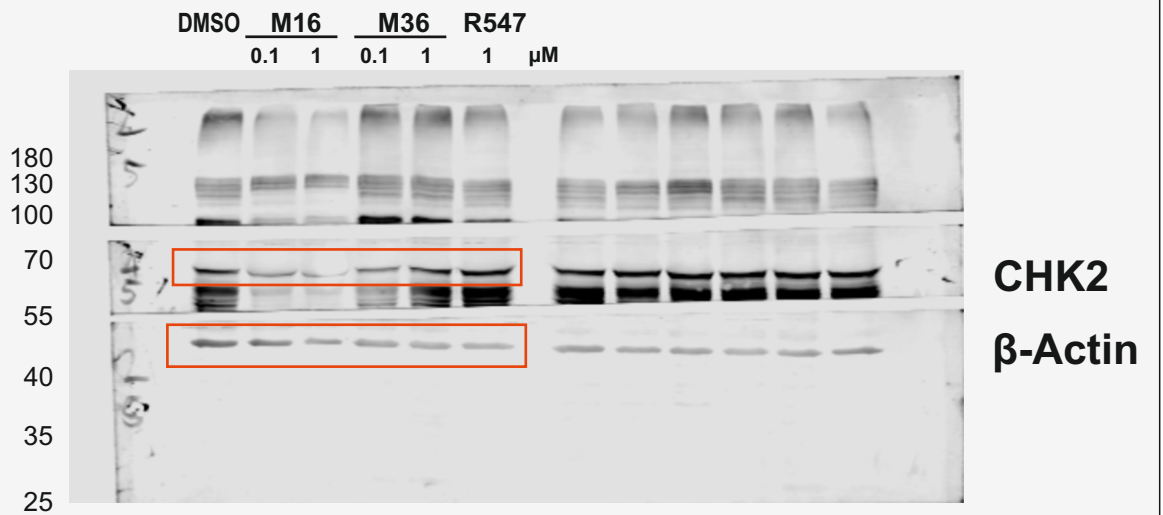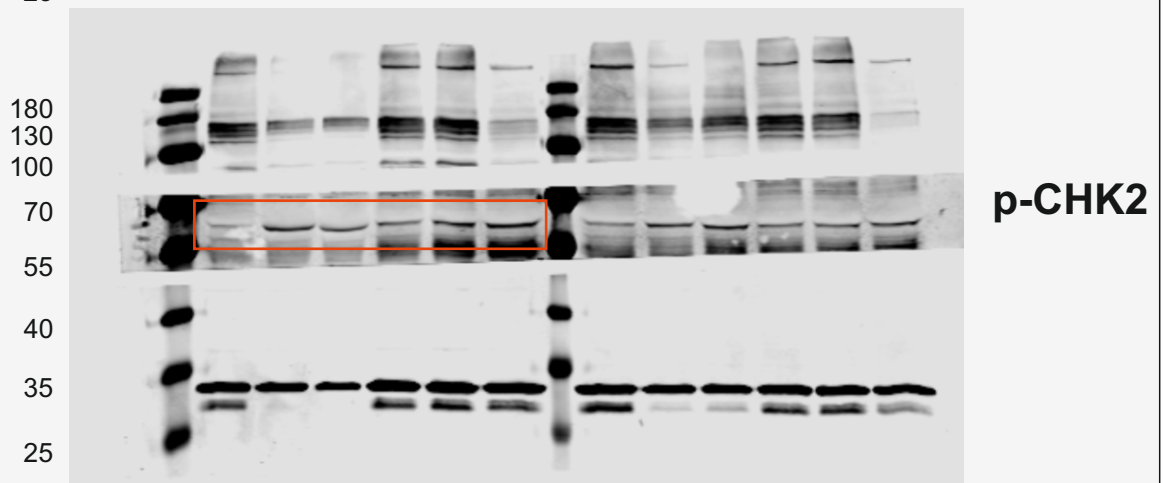

# Suppl. Figure 2D

(upper panel)

(lower panel)

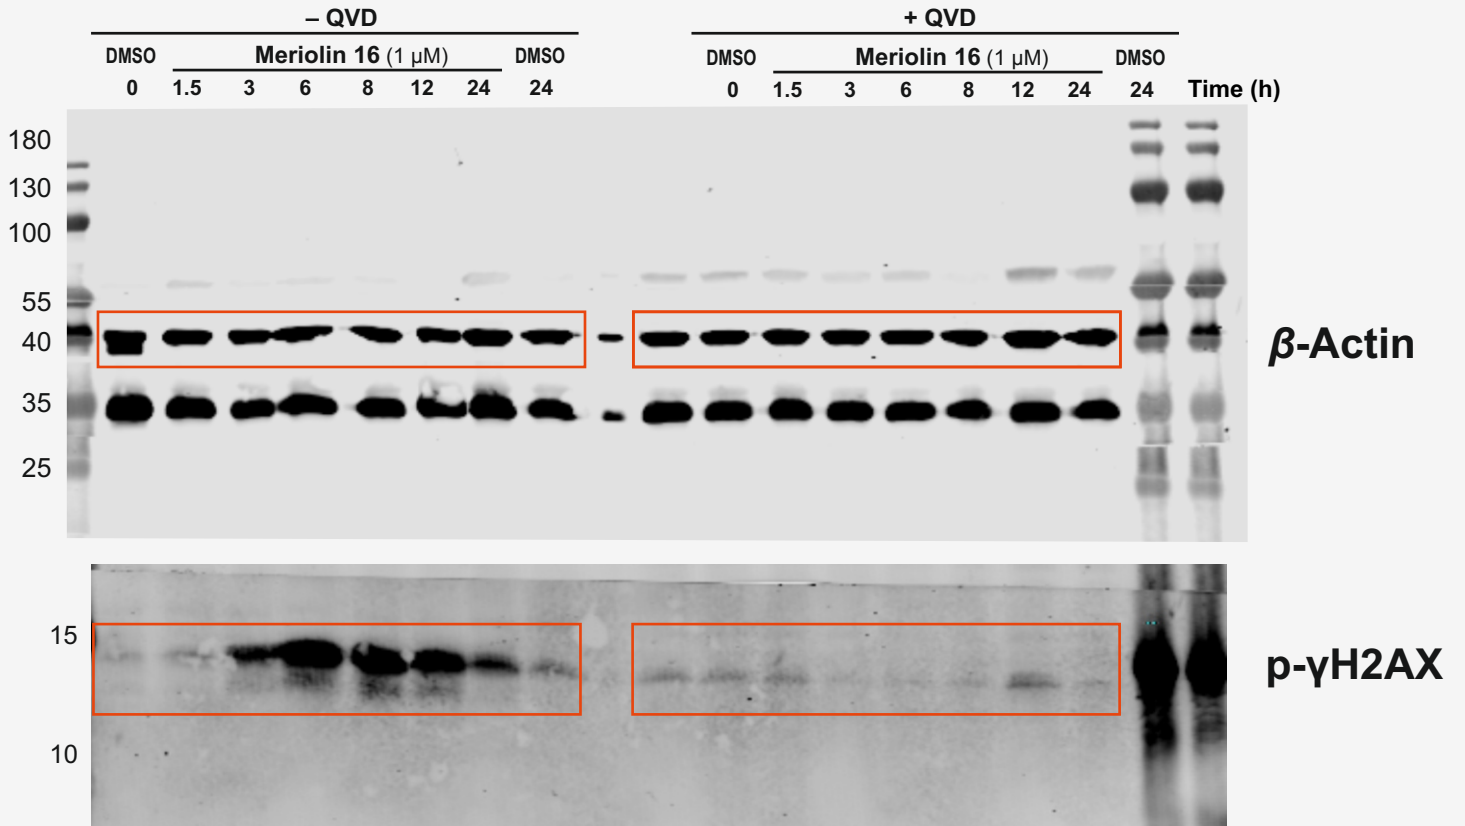

# Suppl. Figure 2E

6 h

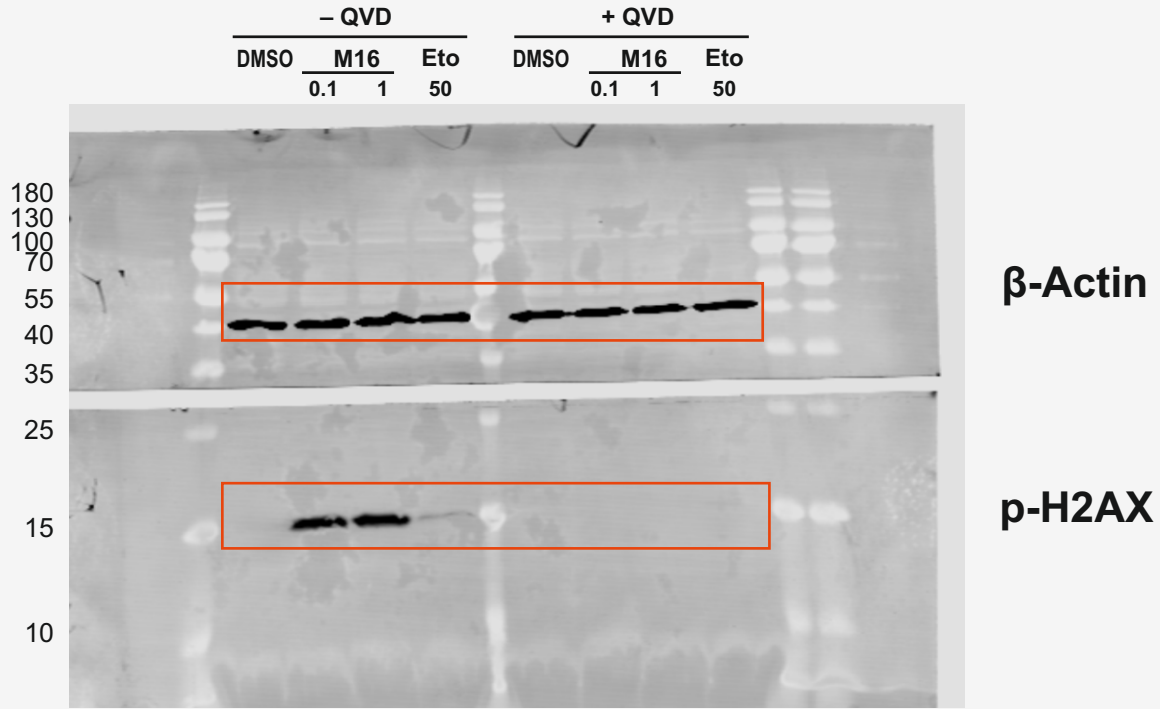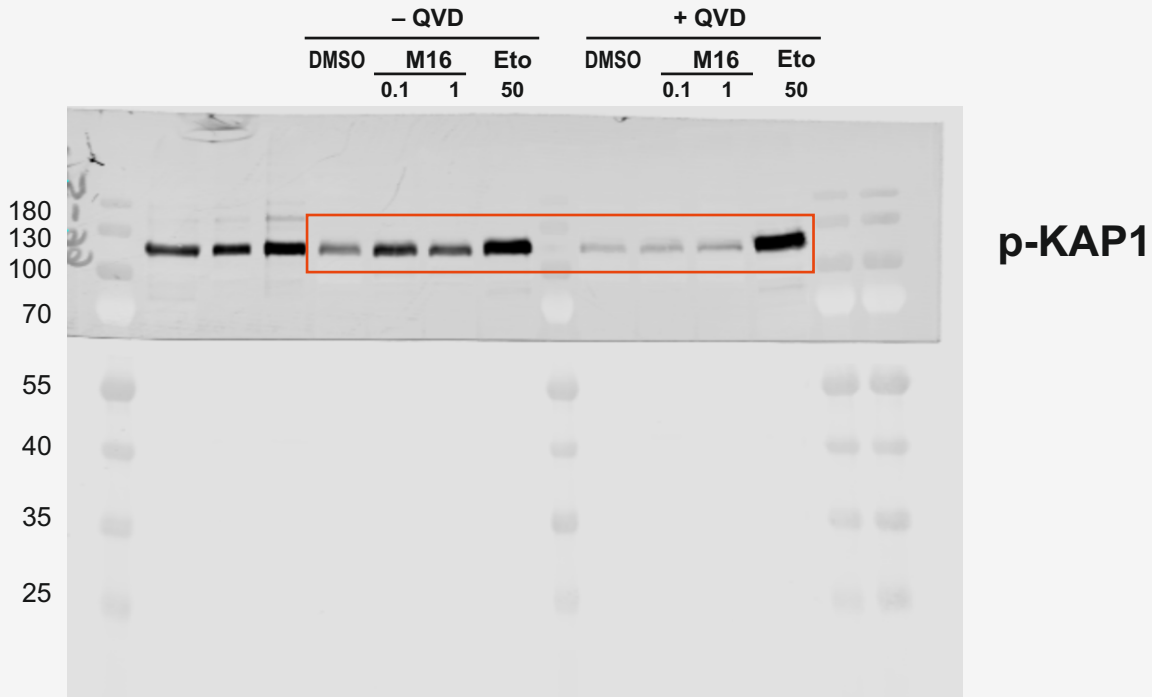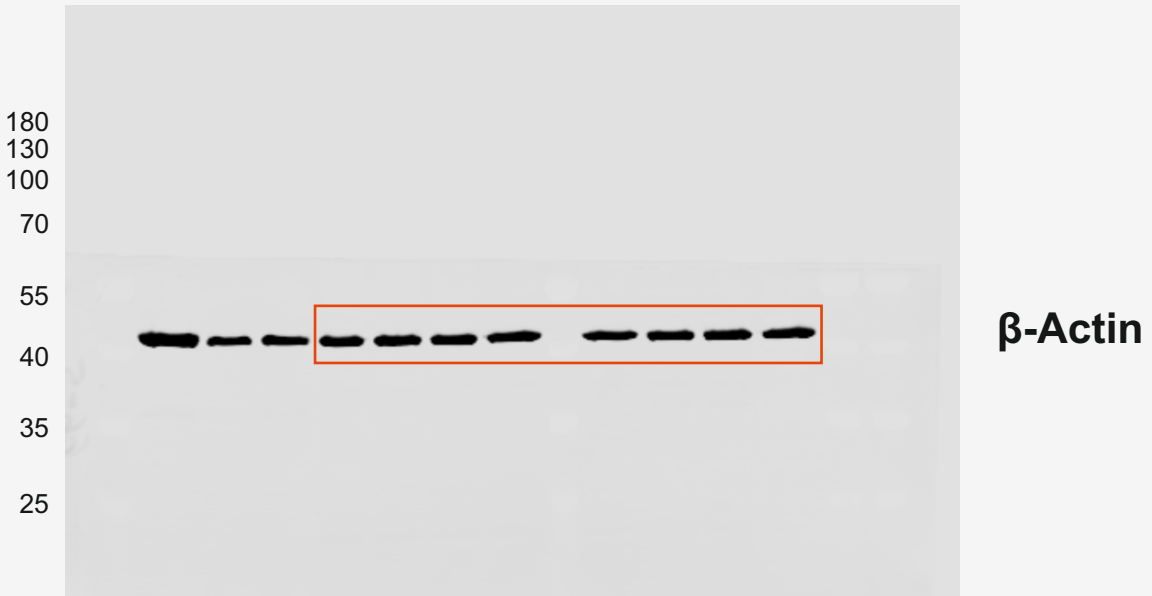

# Suppl. Figure 2E

24 h

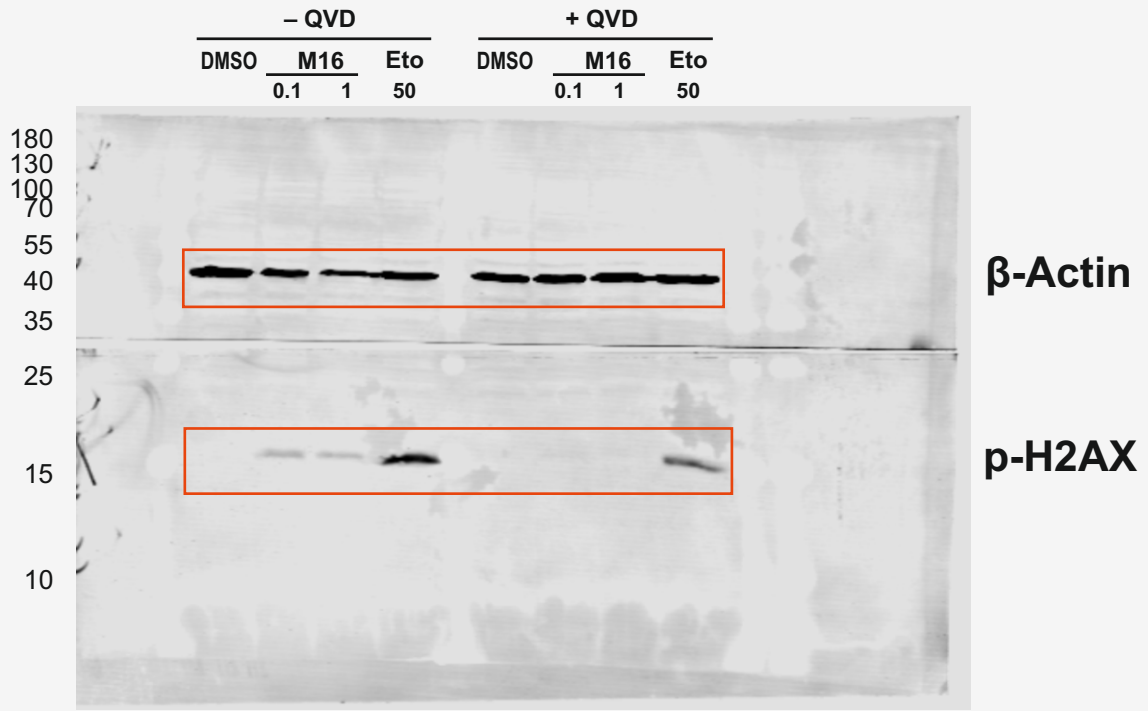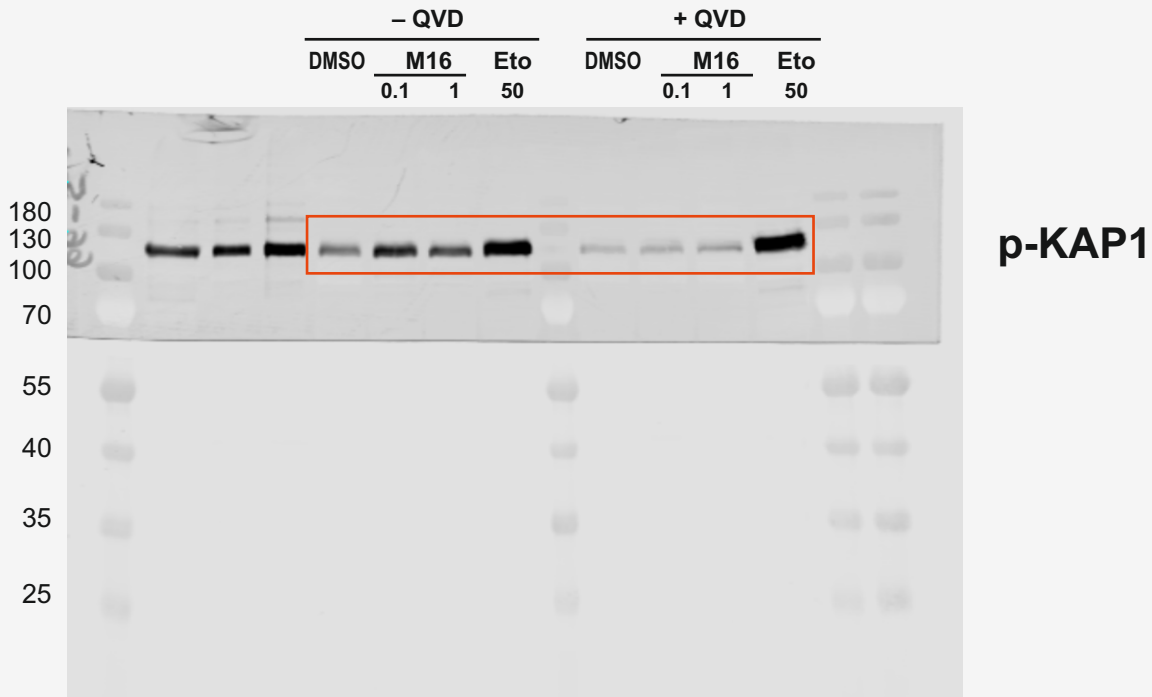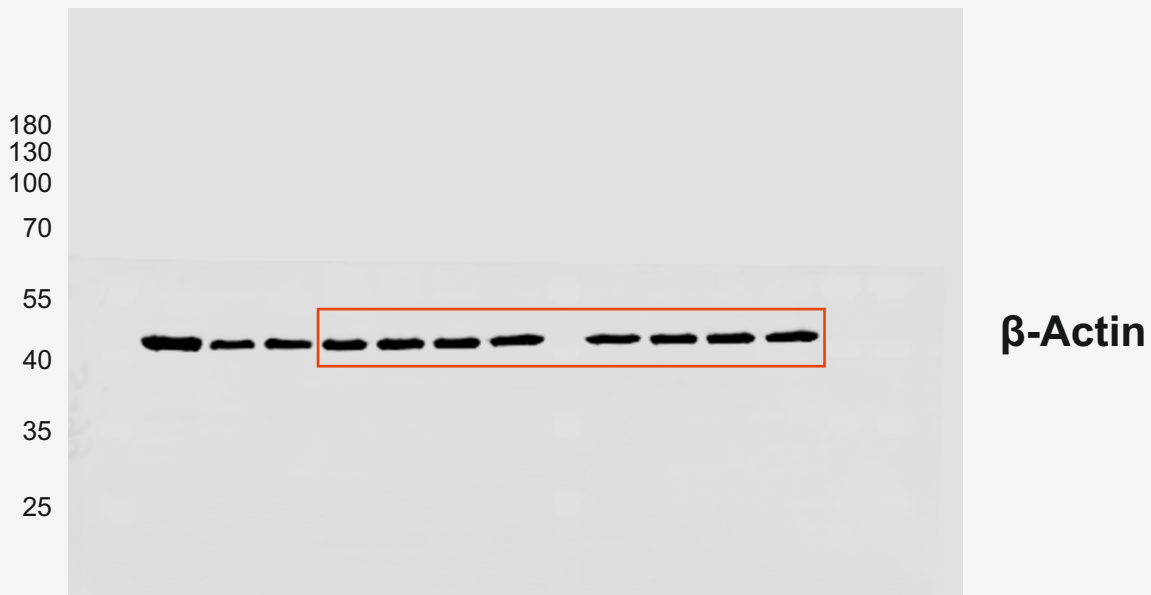

# Suppl. Figure 3

4 h

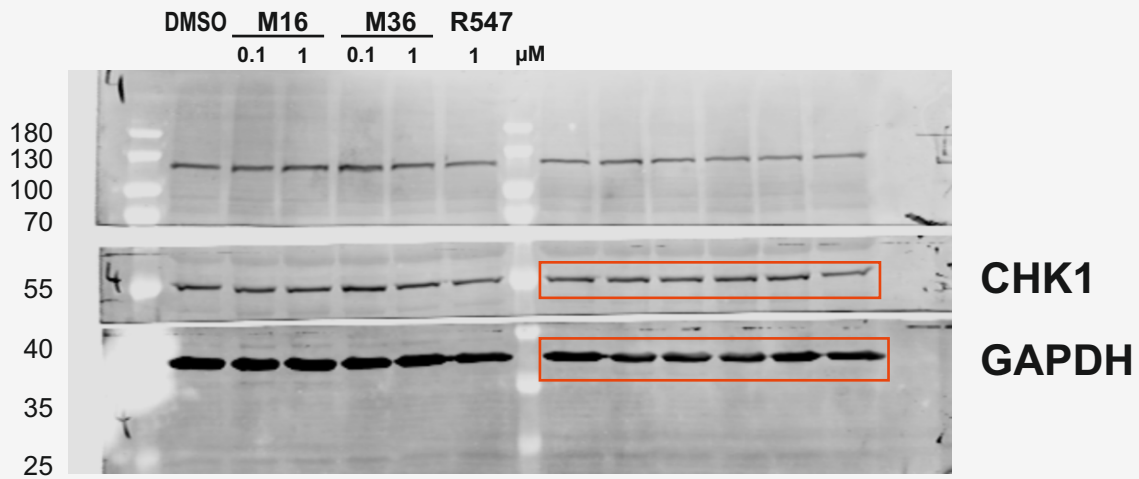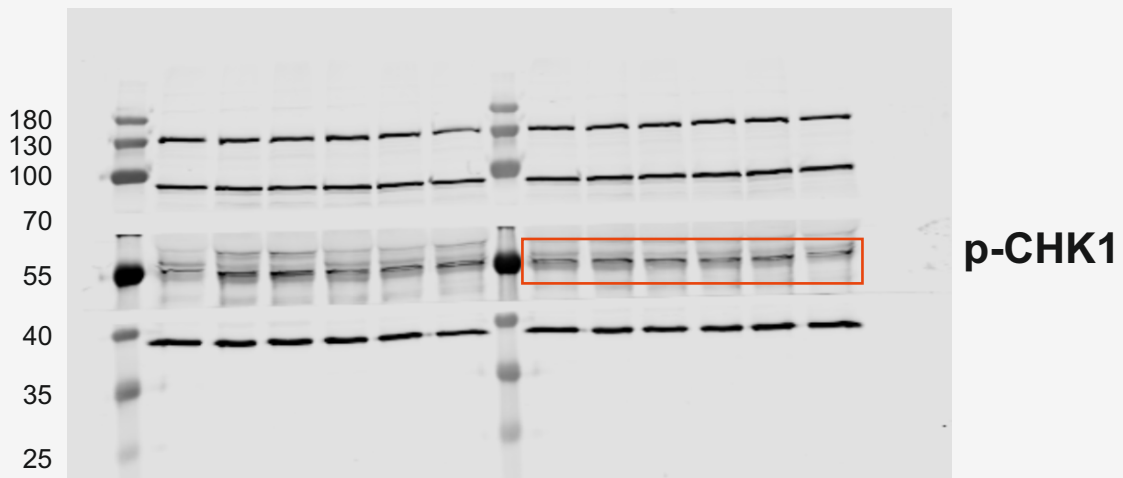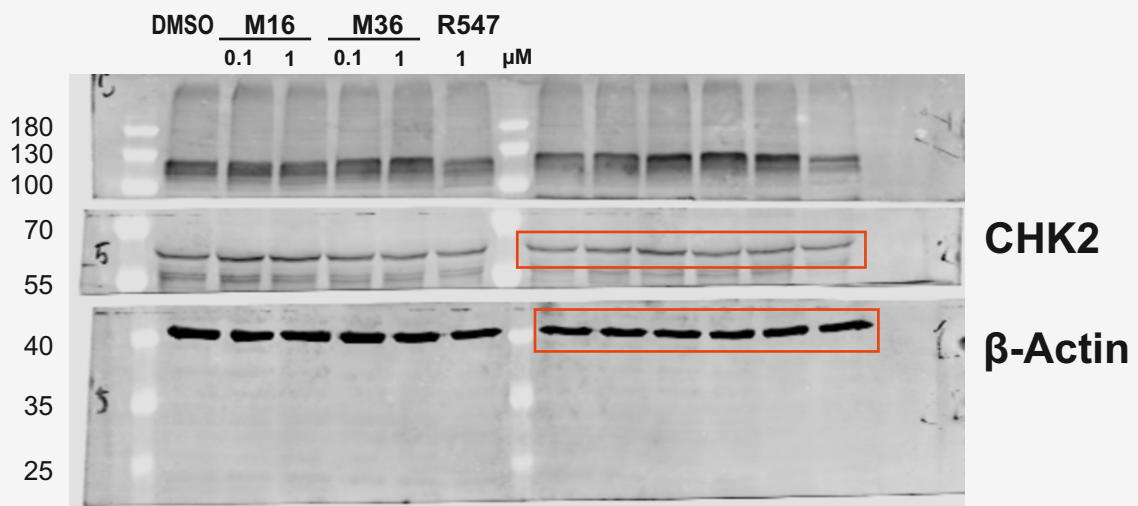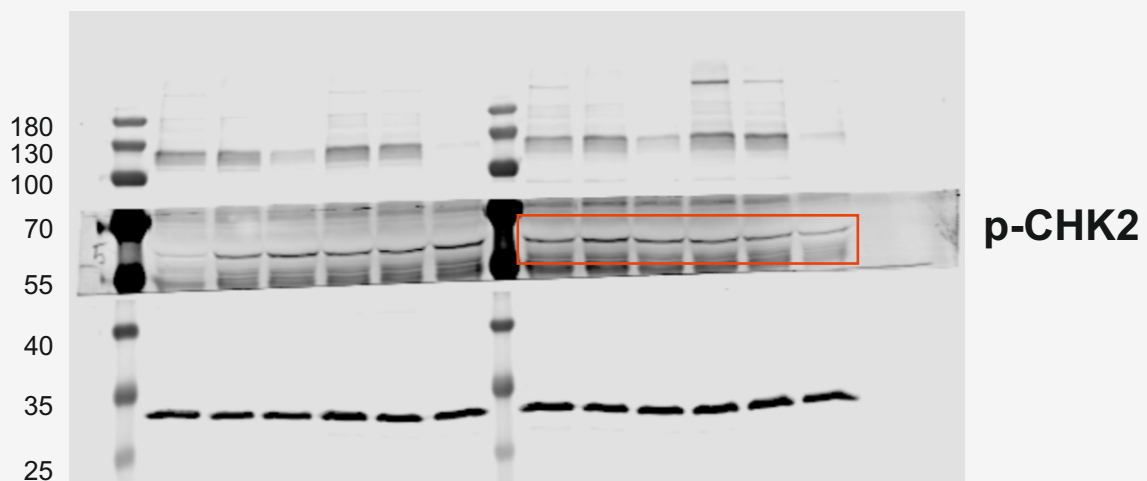

# Suppl. Figure 3

8 h

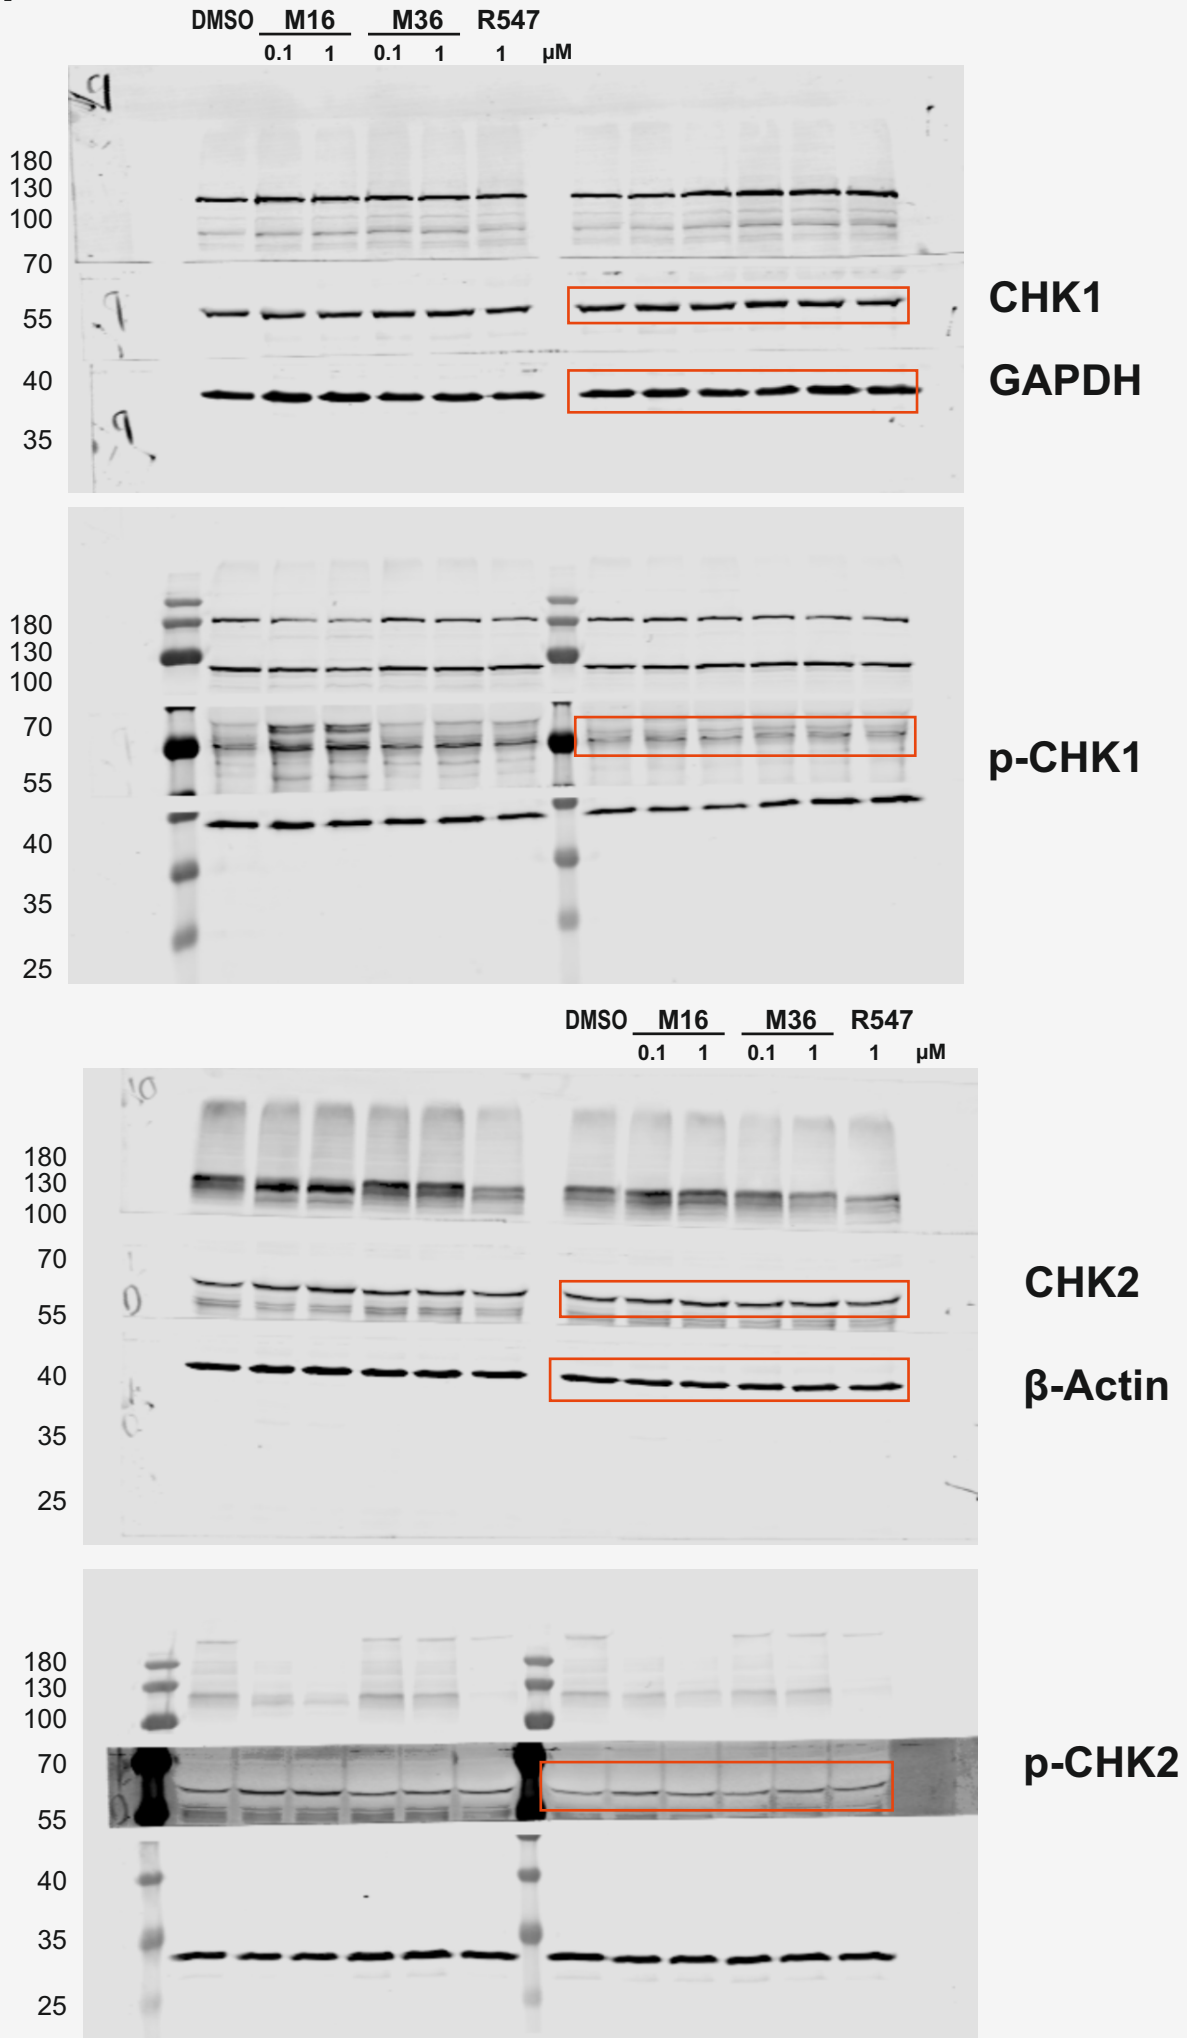

# Suppl. Figure 3

12 h

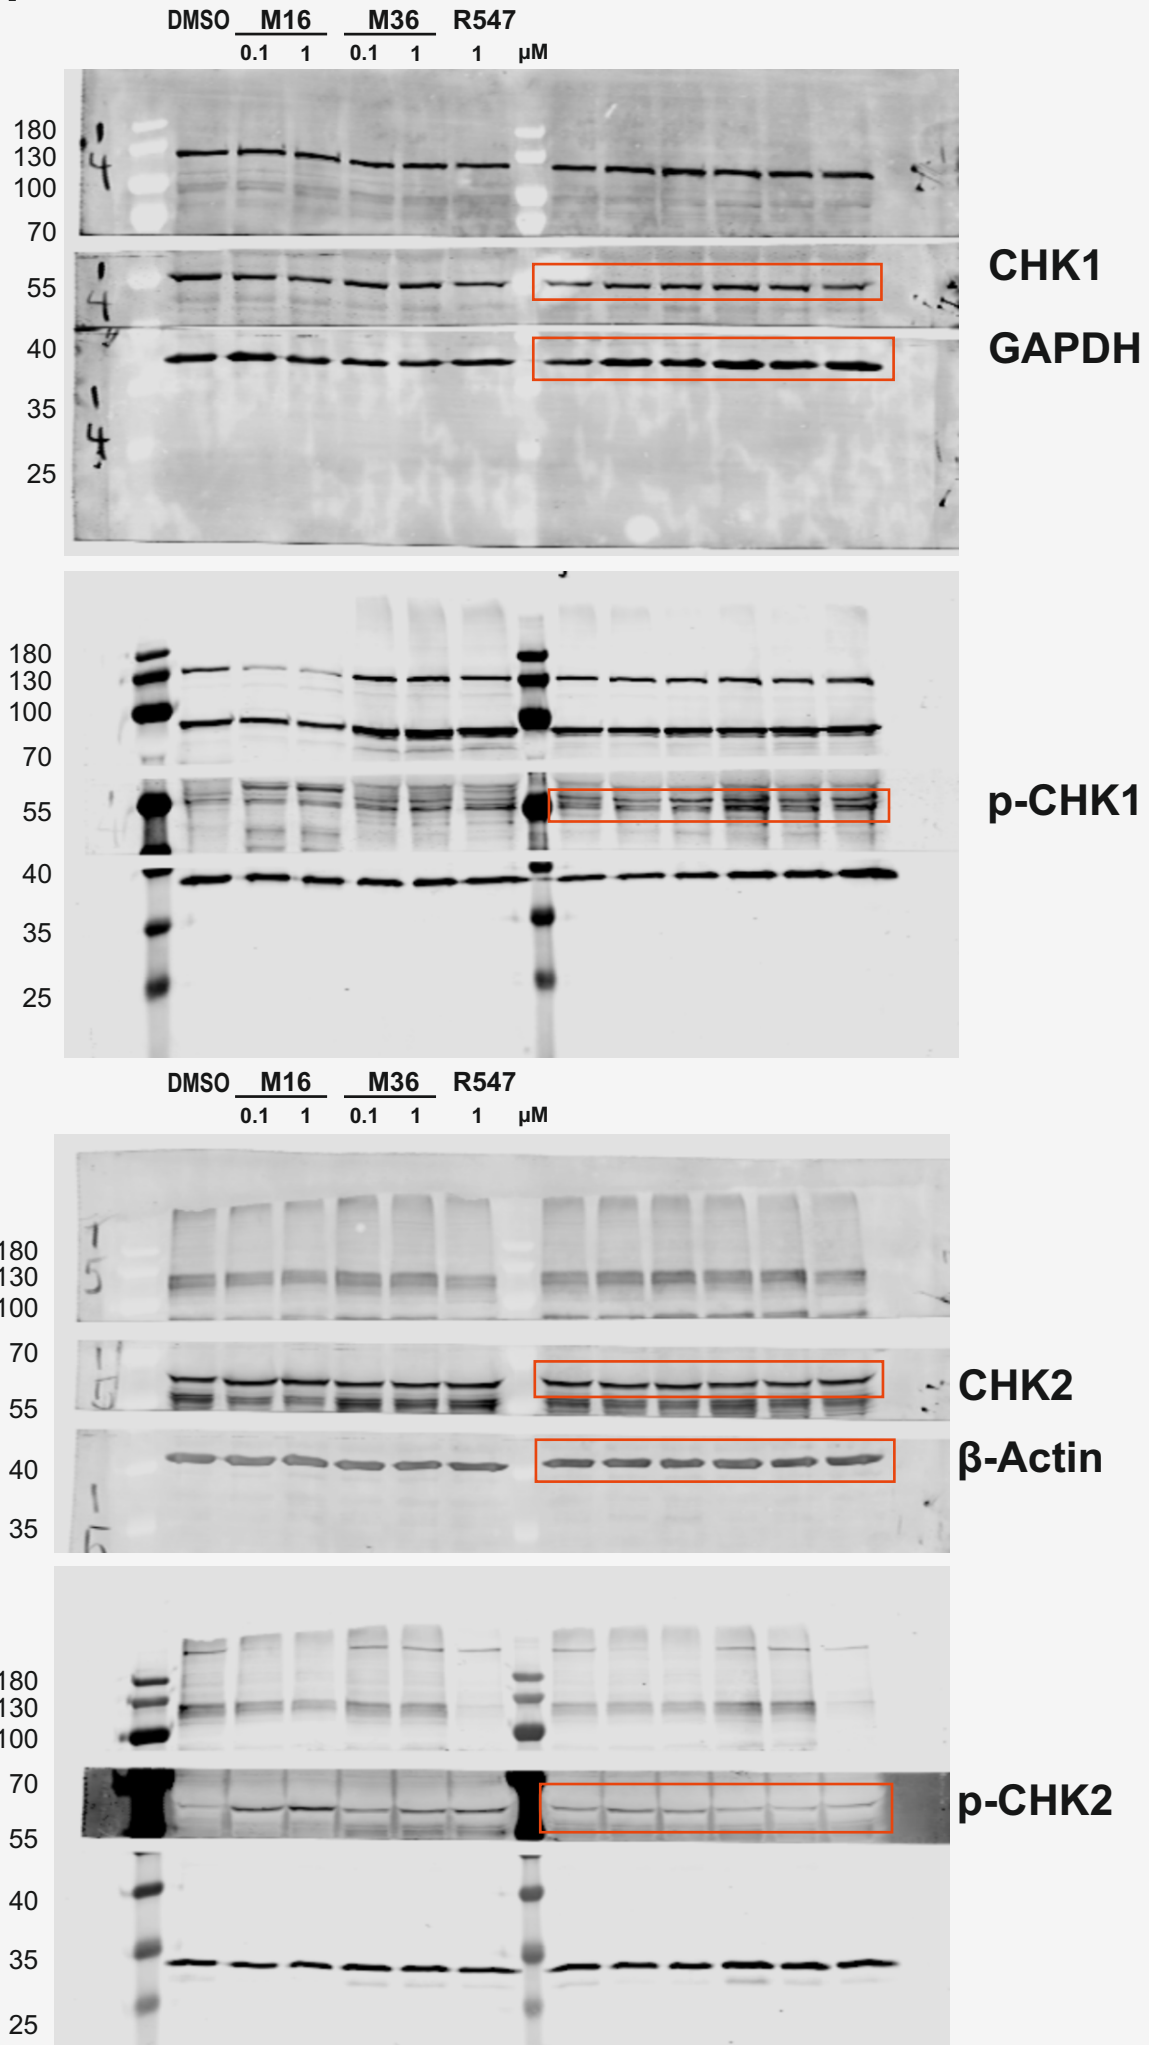



# Suppl. Figure 3

16 h

DMSO M16 M36 R547  
0.1 1 0.1 1 1  $\mu$ M

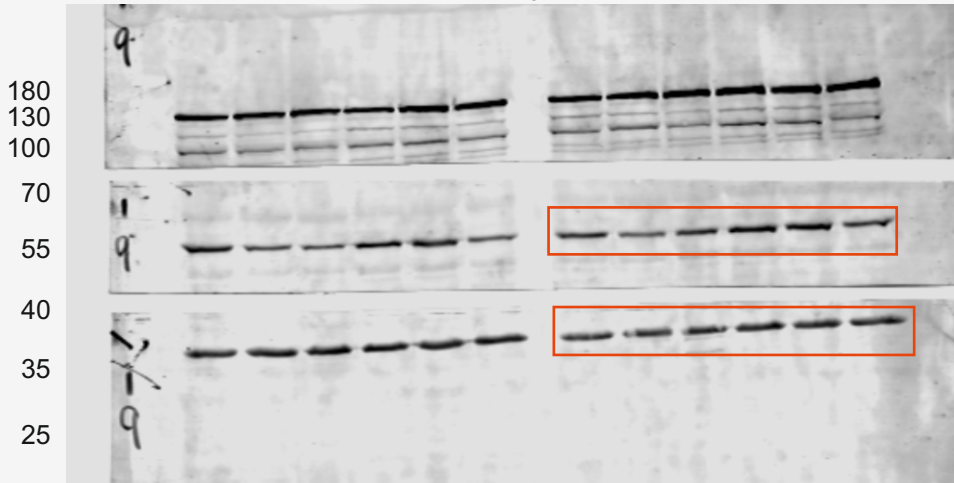

CHK1

GAPDH

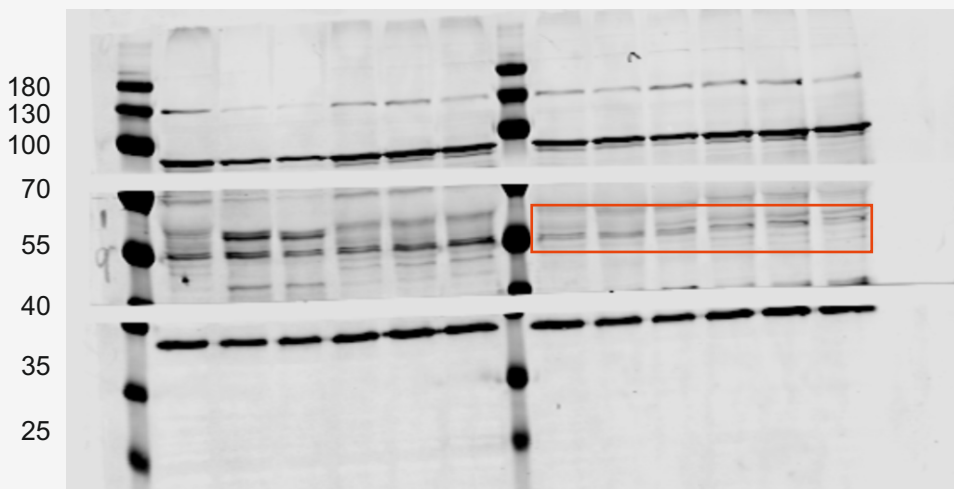

p-CHK1

DMSO M16 M36 R547  
0.1 1 0.1 1 1  $\mu$ M

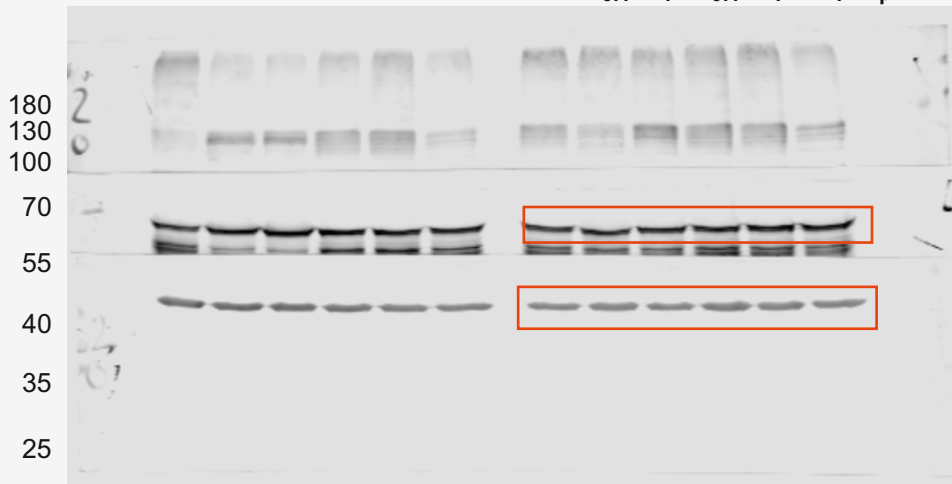

CHK2

$\beta$ -Actin

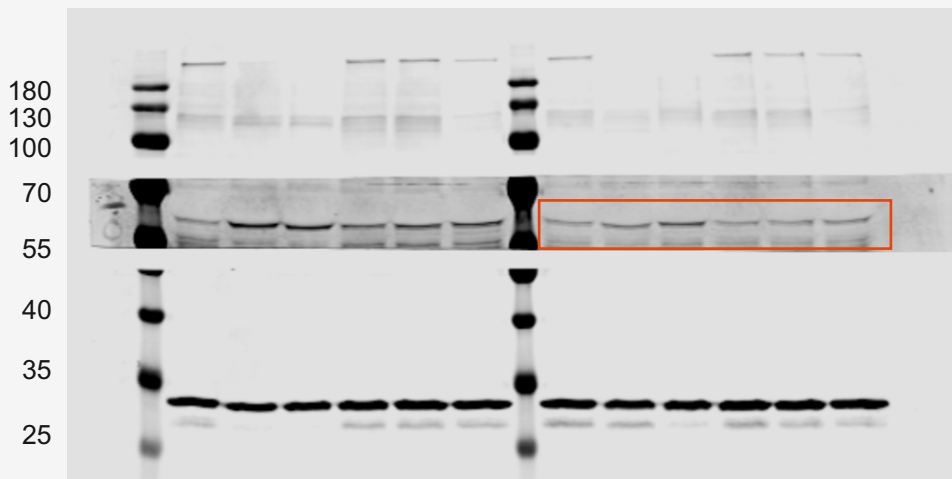

p-CHK2

# Suppl. Figure 3

24 h

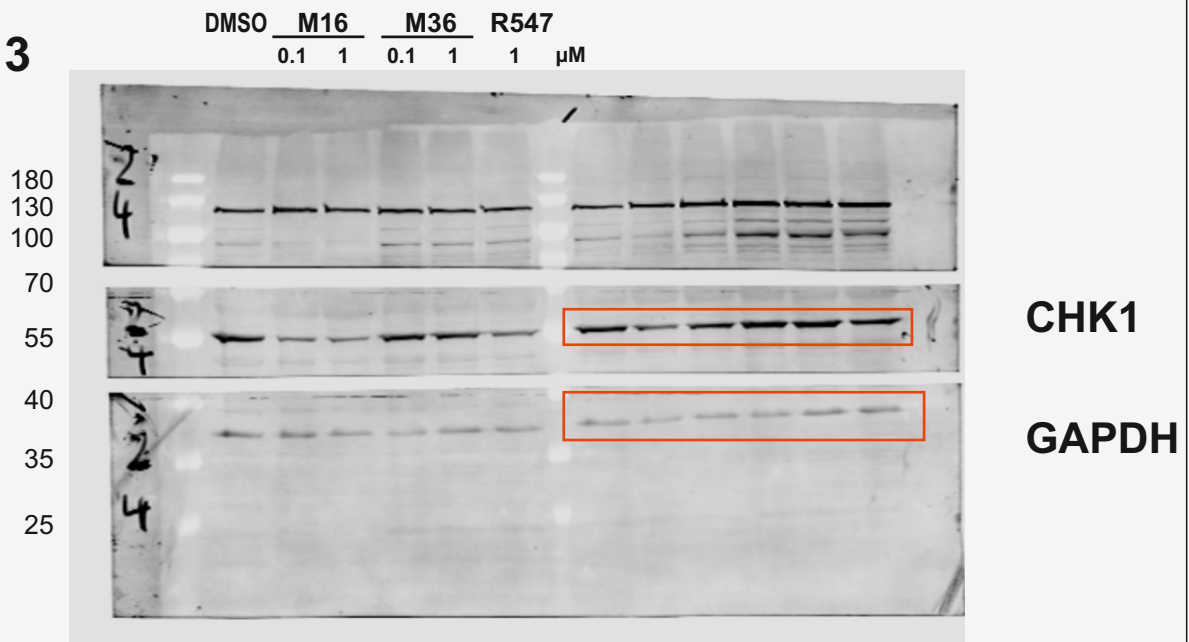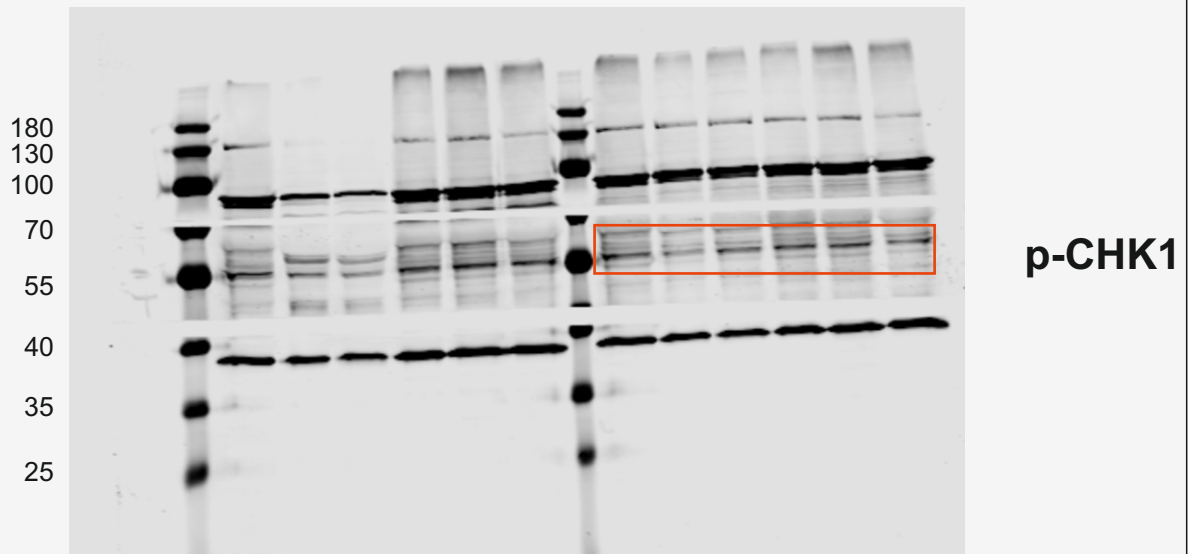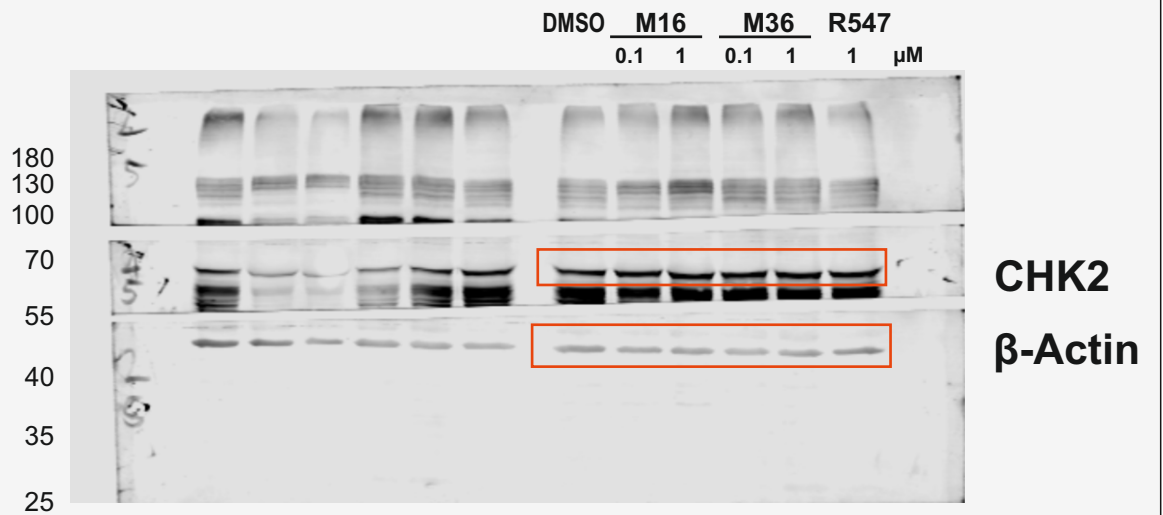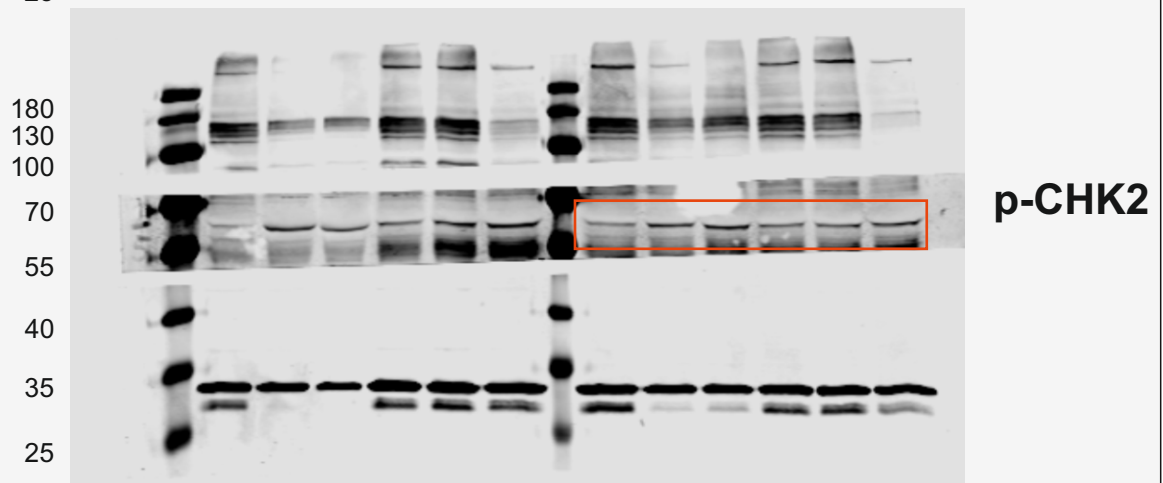

# Suppl. Figure 4A,B

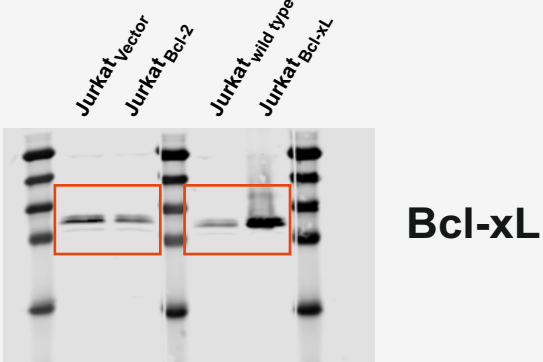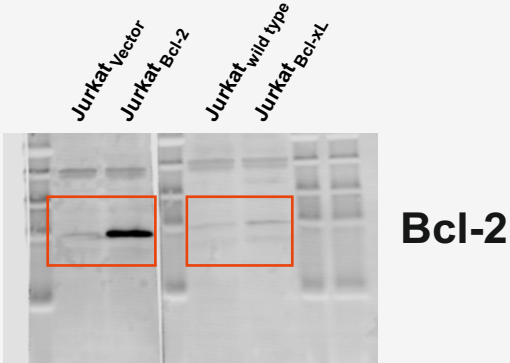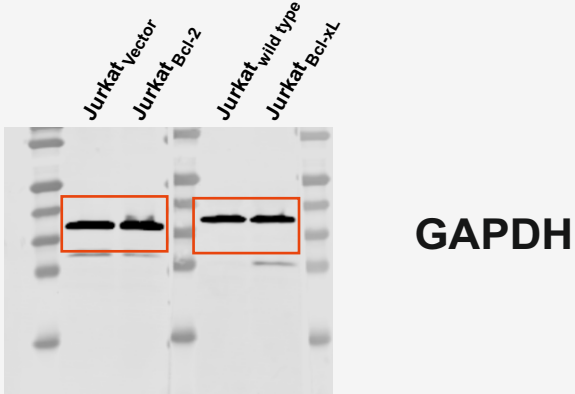

# Suppl. Figure 4C

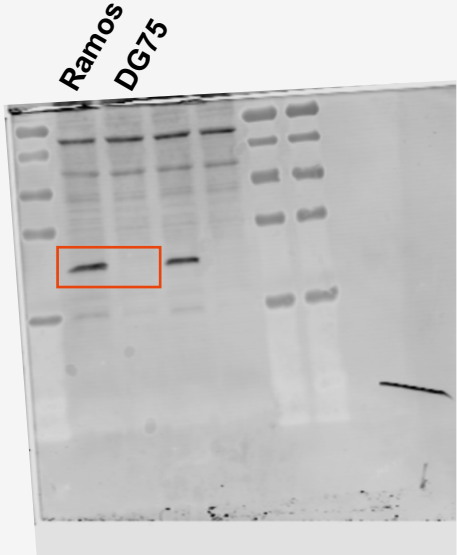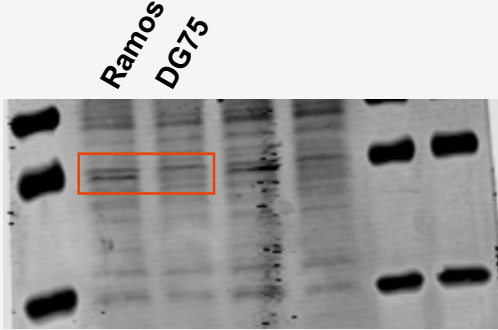

Loading control  
for Bak immunoblot

Ramos  
DG75

Loading control  
for Bax immunoblot

Ramos  
DG75

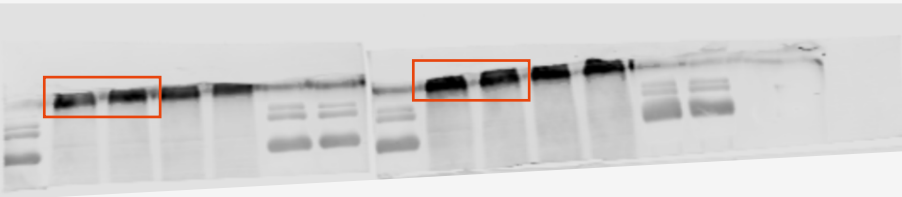

# Suppl. Figure 5A

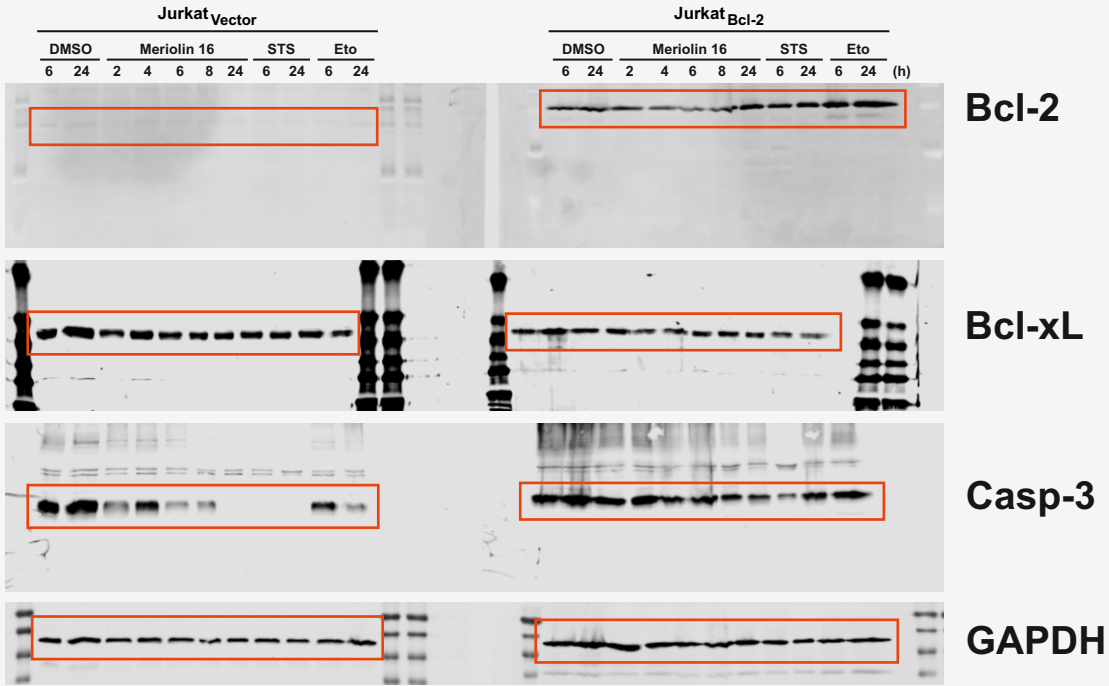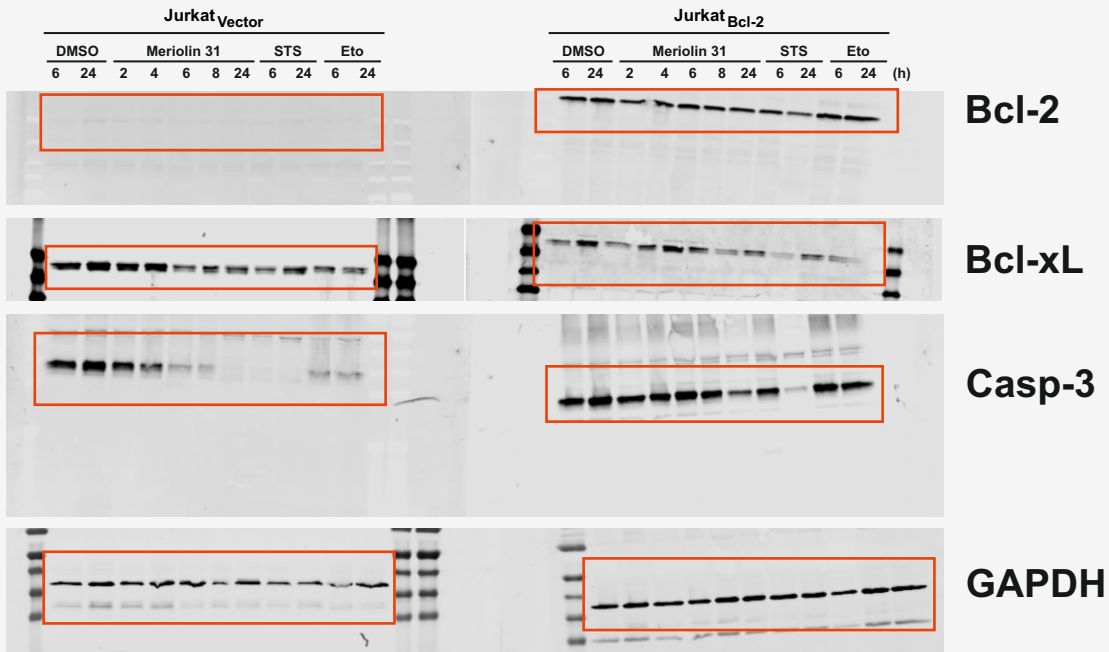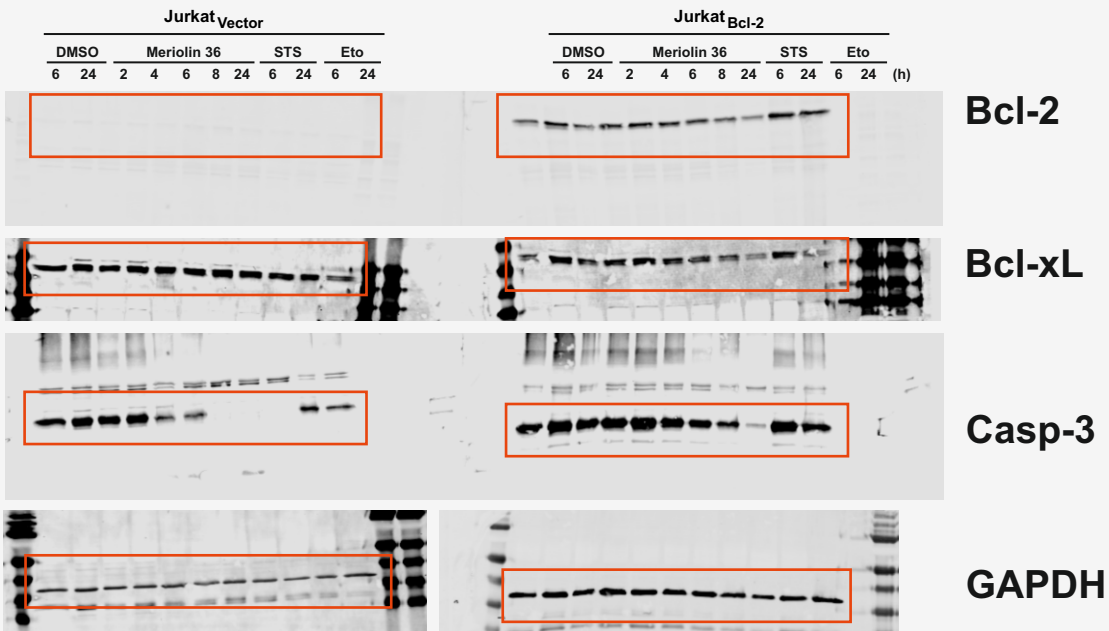

# Suppl. Figure 5B

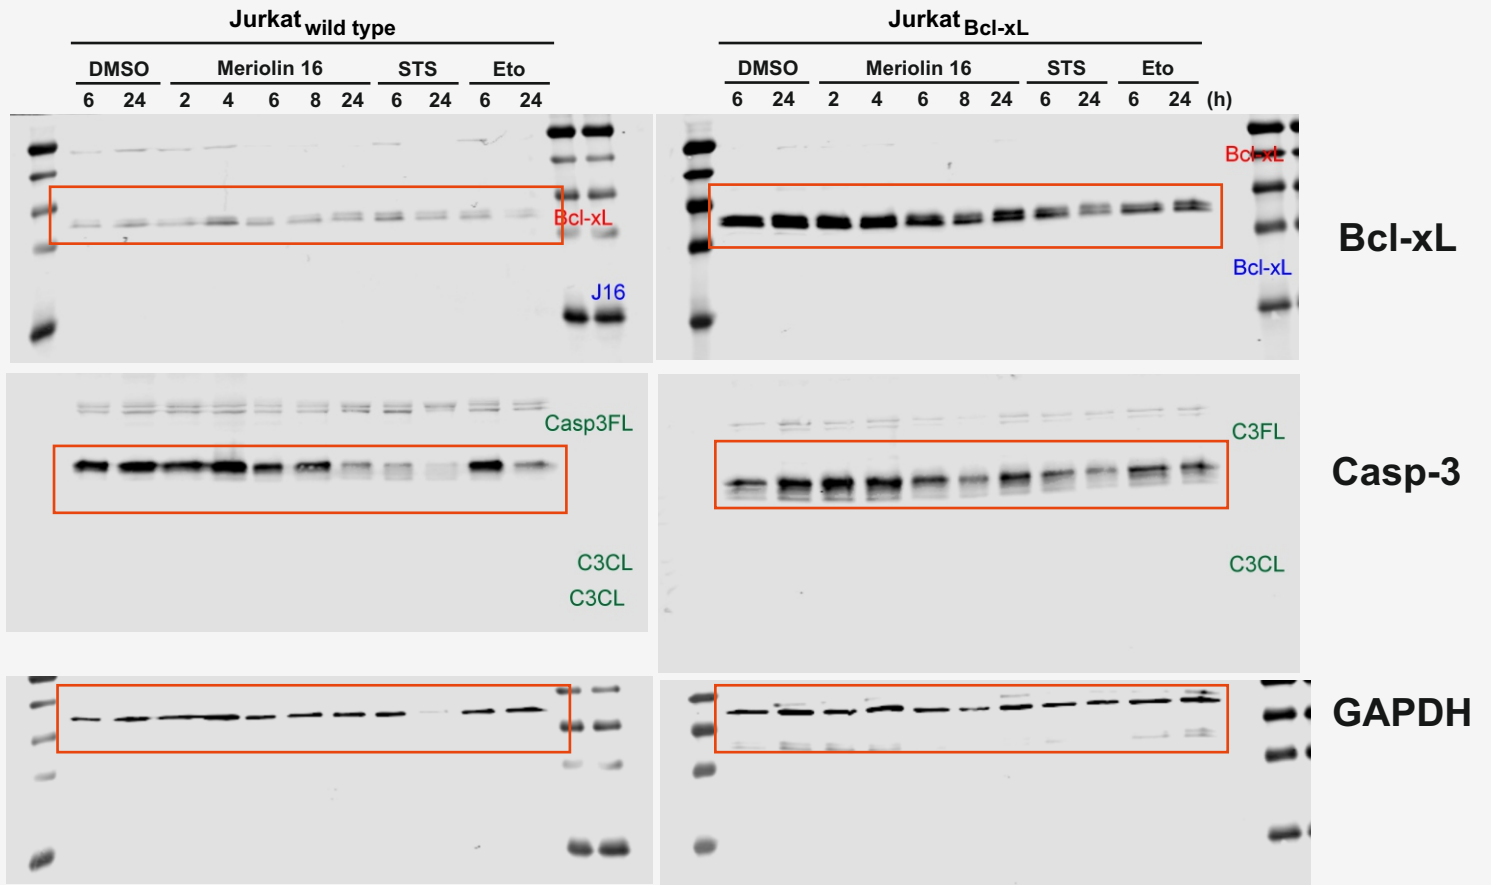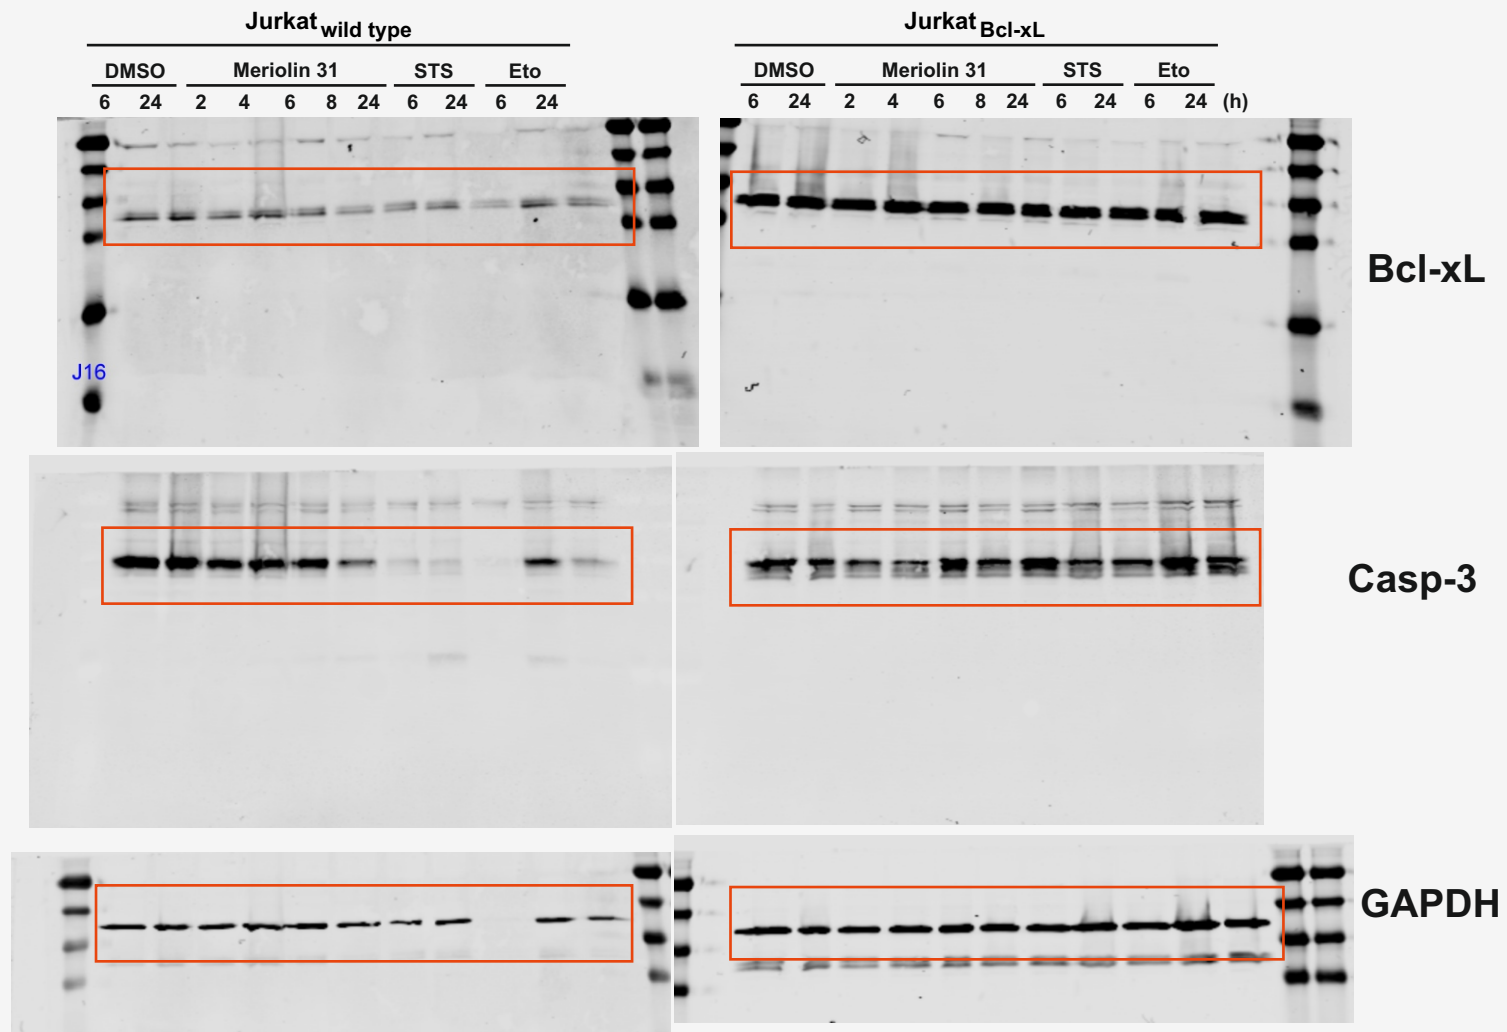

# Suppl. Figure 5B

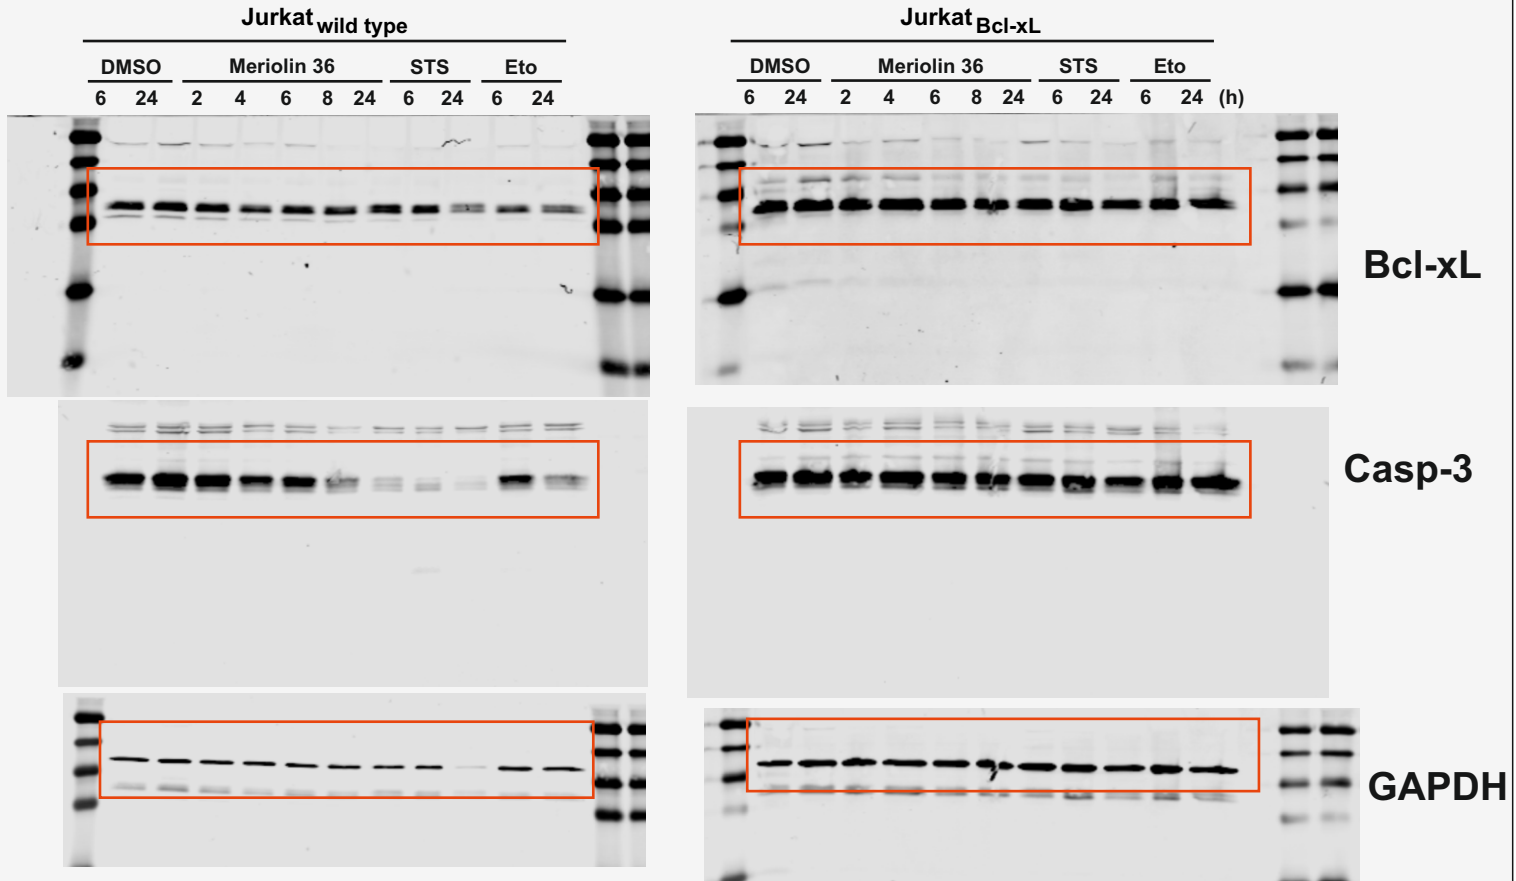

Supplement: 41420_2024_1901_MOESM2_ESM.pdf [file 41420_2024_1901_MOESM2_ESM.pdf]
